# Supplementary material for: Co-targeting of BAX and BCL-XL proteins broadly overcomes resistance to apoptosis in cancer
Source: PubMed Central journal article supplement (PMC8901805; doi:10.1038/s41467-022-28741-7), 2022-03-07
Supplement: 41467_2022_28741_MOESM1_ESM.pdf [file 41467_2022_28741_MOESM1_ESM.pdf]

## **Supplementary Information**

### **Co-targeting of BAX and BCL-XL proteins broadly overcomes resistance to apoptosis in cancer**

Andrea Lopez<sup>1-3#</sup>, Denis E. Reyna<sup>1-3#</sup>, Nadege Gitego<sup>1-3</sup>, Felix Kopp<sup>1</sup>, Hua Zhou<sup>4-6</sup>,  
Miguel A. Miranda-Roman<sup>7-8</sup>, Lars Ulrik Nordstrøm<sup>1</sup>, Swathi-Rao Narayanagari<sup>9</sup>, Ping Chi  
<sup>7,10-11</sup>, Eduardo Vilar<sup>12</sup>, Aristotelis Tsirigos<sup>4-6</sup>, Evripidis Gavathiotis<sup>1-3,13\*</sup>

**Supplementary Figures and Figure Legends 1-14**

**Supplementary Tables 1-6**

**Supplementary Methods**

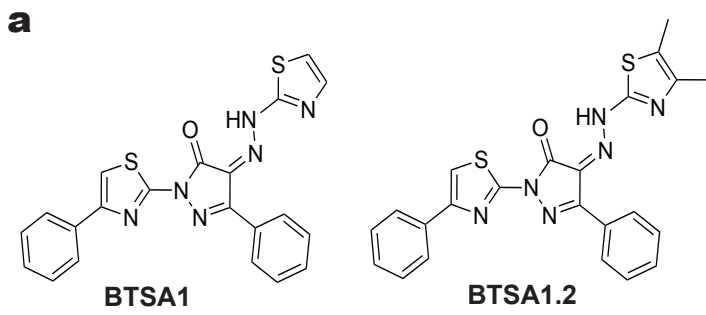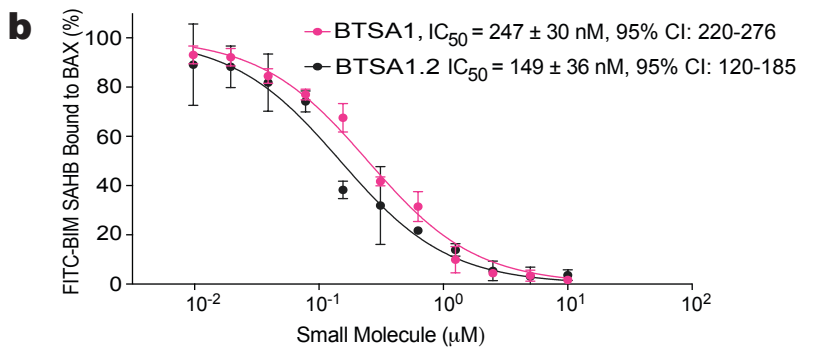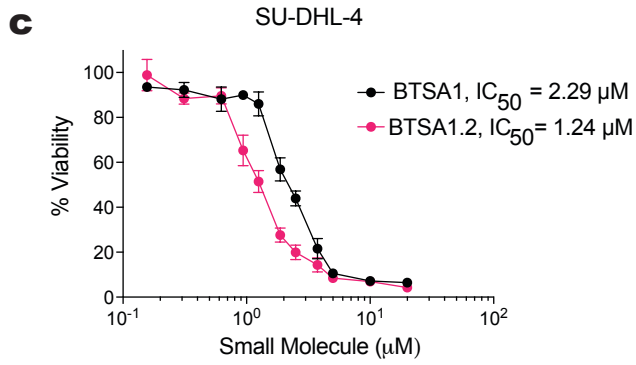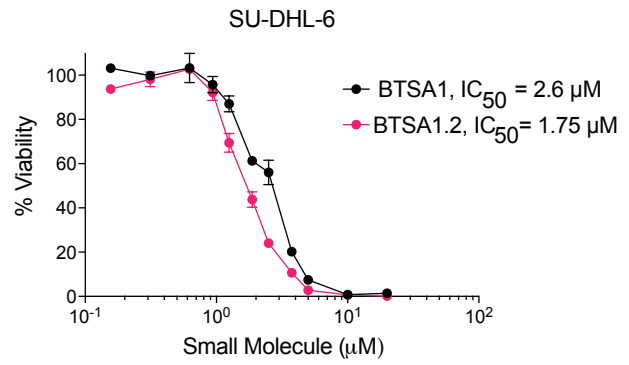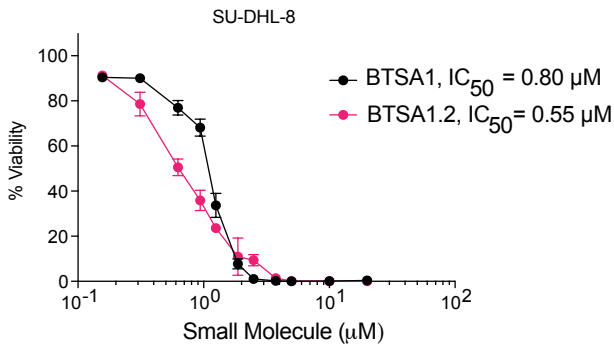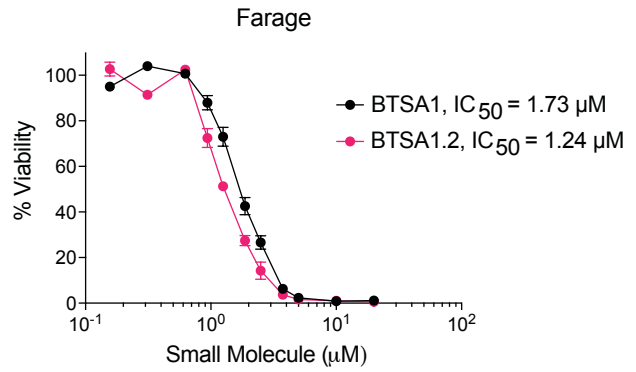

**d**

Temp.  $^{\circ}\text{C}$  25 50 52.1 55.4 59.4 64.9 69.2 72.1 74

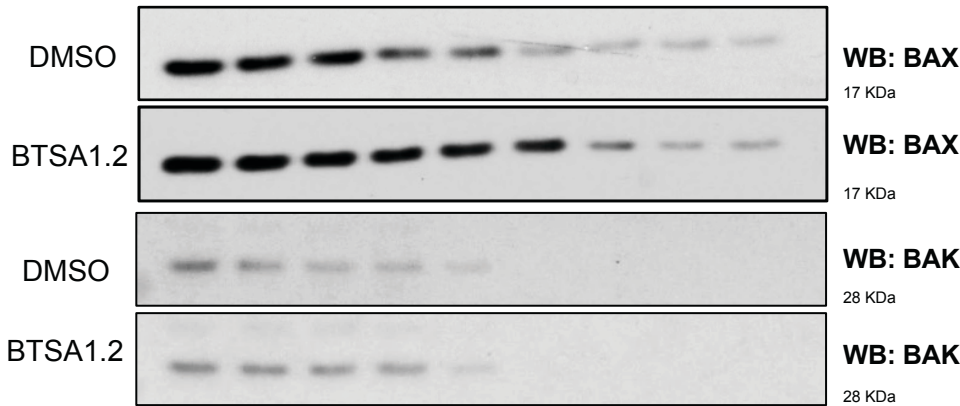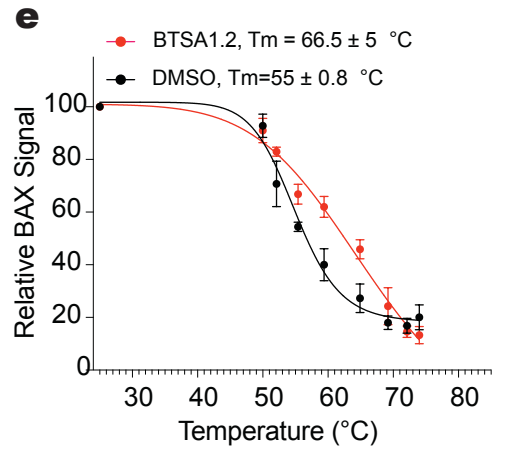

**f**

Temp.  $^{\circ}\text{C}$  25 50 52.1 55.4 59. 64.9 69.2 72.1 74

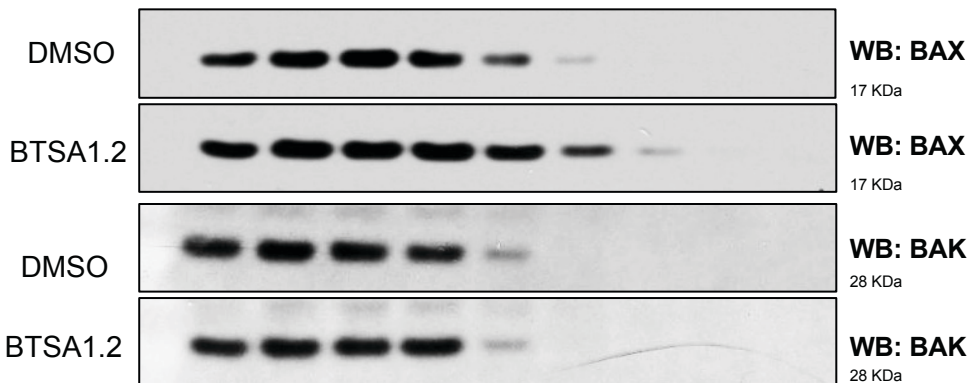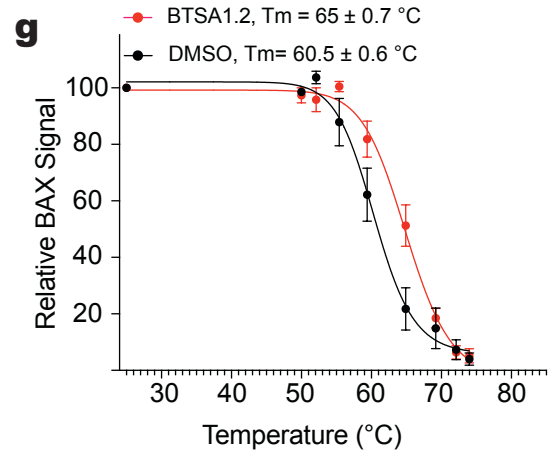

**Supplementary Figure 1. BTSA1.2, analog of BTSA1, with improved binding to BAX, cellular activity and on target engagement activity.**

**a**, Structures of BTSA1 and BTSA1.2. **b**, Competitive fluorescence polarization assay of BTSA1 and BTSA1.2 competing FITC-BIM SAHB binding to BAX. Data are mean  $\pm$  SD from n=3 independent experiments. **c**, Viability assay of lymphoma cell lines upon treatment of BTSA1 or BTSA1.2. Data are mean  $\pm$  SD of three technical replicates from n=2 independent experiments. **d**, Cellular thermal shift assay (CETSA) of BAX and BAK in BxPC-3 cells treated with vehicle (DMSO) or 40  $\mu$ M BTSA1.2 for 15 min. Blots are representative of three independent experiments. **e**, Melting curves of CETSA data for BAX in BxPC-3 cells were generated by densitometric analysis. Data are mean  $\pm$  SD from n=3 independent experiments.  $T_m \pm$  SEM values for DMSO and BTSA1.2 are indicated. **f**, Cellular thermal shift assay (CETSA) of BAX and BAK in SW480 cells treated with vehicle (DMSO) or 40  $\mu$ M BTSA1.2 for 15 min. Blots are representative of three independent experiments. **g**, Melting curves of CETSA data for BAX in SW480 cells were generated by densitometric analysis. Data are mean  $\pm$  SD from n=3 independent experiments.  $T_m \pm$  SEM values for DMSO and BTSA1.2 are indicated. Source data are provided as a Source Data file.

**a**

| Time (h) | 1    | 2    | 3    | Mean | SD   |
|----------|------|------|------|------|------|
| 0.25     | 761  | 233  | 368  | 454  | 274  |
| 0.5      | 1740 | 474  | 1330 | 1181 | 646  |
| 1.0      | 4290 | 1580 | 2010 | 2627 | 1456 |
| 2.0      | 5260 | 2510 | 3240 | 3670 | 1425 |
| 4.0      | 3700 | 2540 | 3260 | 3167 | 586  |
| 8.0      | 2480 | 2120 | 1950 | 2183 | 271  |
| 24       | 1040 | 1100 | 1170 | 1103 | 65.1 |

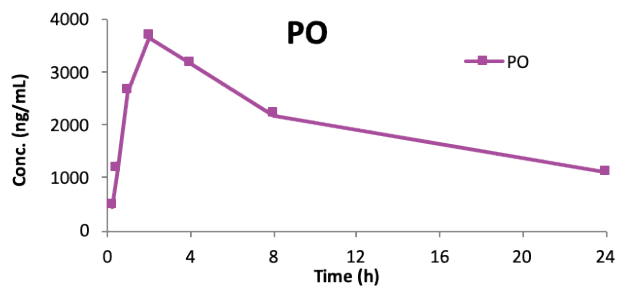**b**

| Time (h) | 4    | 5    | 6    | Mean | SD  |
|----------|------|------|------|------|-----|
| 0.083    | 2160 | 1870 | 3420 | 2483 | 824 |
| 0.25     | 1750 | 1440 | 1930 | 1707 | 248 |
| 0.5      | 1390 | 1560 | 2160 | 1703 | 405 |
| 1.0      | 1840 | 1650 | 2820 | 2103 | 628 |
| 2.0      | 2020 | 3180 | 2620 | 2607 | 580 |
| 4.0      | 1170 | 2520 | 2310 | 2000 | 726 |
| 8.0      | 899  | 1540 | 1050 | 1163 | 335 |
| 24       | 566  | 1090 | 1220 | 959  | 346 |

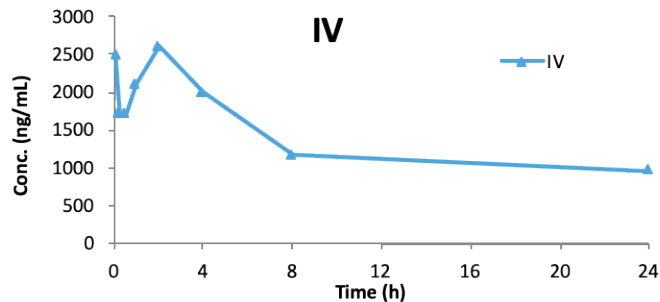**c**

|    |      | $T_{1/2}$ | $T_{max}$ | $C_{max}$ | $AUC_{last}$ | $AUC_{INF\_obs}$ | $CL_{obs}$  | $MRT_{INF\_obs}$ | $V_{ss\_obs}$ | $F(\%)$ |
|----|------|-----------|-----------|-----------|--------------|------------------|-------------|------------------|---------------|---------|
|    |      | (h)       | (h)       | (ng/mL)   | (h*ng/mL)    | (h*ng/mL)        | (mL/min/kg) | (h)              | (mL/kg)       |         |
| PO | Mean | 14.405    | 3.333     | 3686.667  | 47003.131    | 70044.402        | --          | 21.683           | --            | 49.2    |
|    | SD   | 2.714     | 1.155     | 1409.302  | 6462.939     | 1551.231         | --          | 4.433            | --            |         |
| IV | Mean | 24.640    | 2.000     | 2673.000  | 31866.471    | 67659.200        | 0.282       | 35.729           | 555.803       |         |
|    | SD   | 8.513     | 0.000     | 593.745   | 8426.532     | 28220.741        | 0.131       | 12.900           | 155.903       |         |

**d**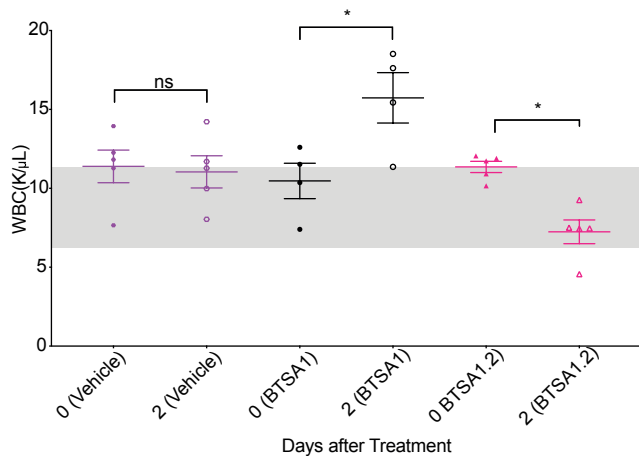**e**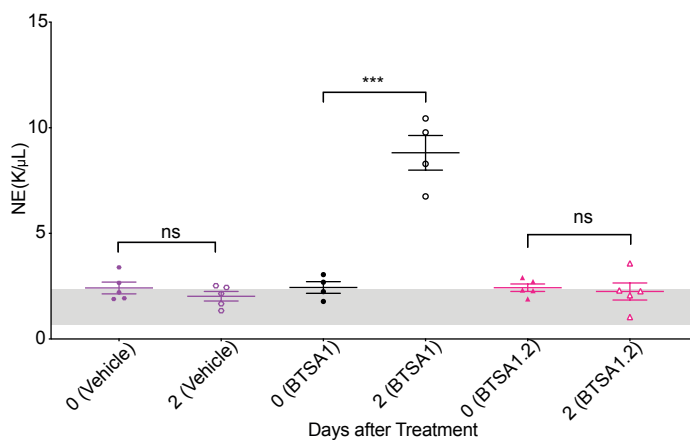

**Supplementary Figure 2. Pharmacokinetic analysis of BTSA1.2 and comparison of *in vivo* safety between BTSA1.2 and BTSA1 by oral administration.**

**a**, Concentrations (ng/mL) of BTSA1.2 in mice plasma after p.o. administration of 3 mg/kg BTSA1.2. **b**, Concentrations (ng/mL) of BTSA1.2 in mice plasma after i.v. administration of 1 mg/kg BTSA1.2. **c**, Pharmacokinetics parameters of BTSA1.2 after p.o. and i.v. administration in mice. Data are mean  $\pm$  SD from n=3 mice. Counts of peripheral **d**, white blood cells and **e**, neutrophils in CD1-IGS mice treated with vehicle, 200 mg/kg BTSA1, or 200 mg/kg BTSA1.2 at 0 and 2 days after treatment. Compounds were administered orally. Normal blood counts range for CD-IGS male mice are indicated in gray. Data are mean  $\pm$  SD from n=5 mice. Statistics were obtained using student t-test: \*, p<0.05; \*\*, p<0.01; \*\*\*, p<0.001; \*\*\*\*, p<0.0001. Source data are provided as a Source Data file.

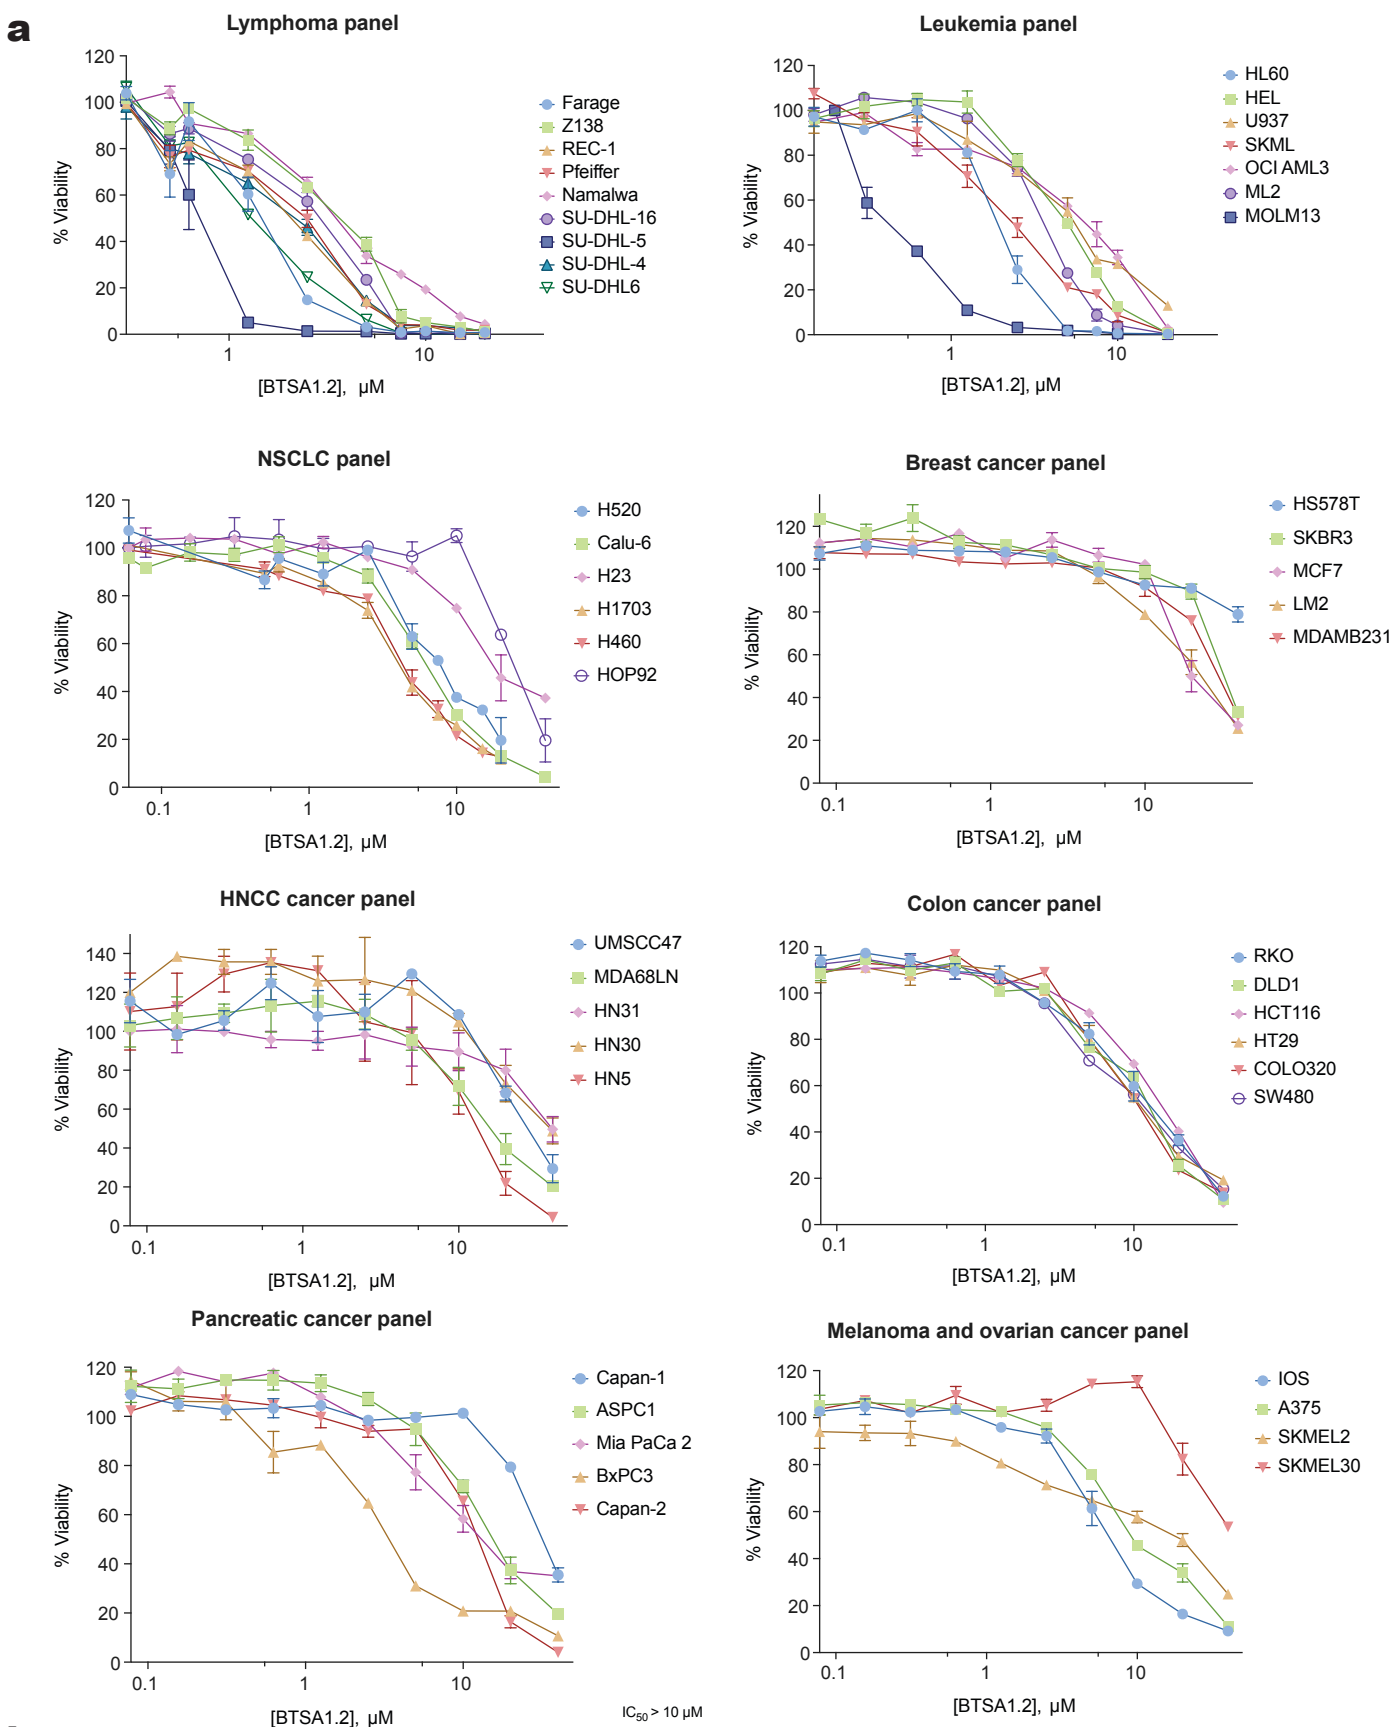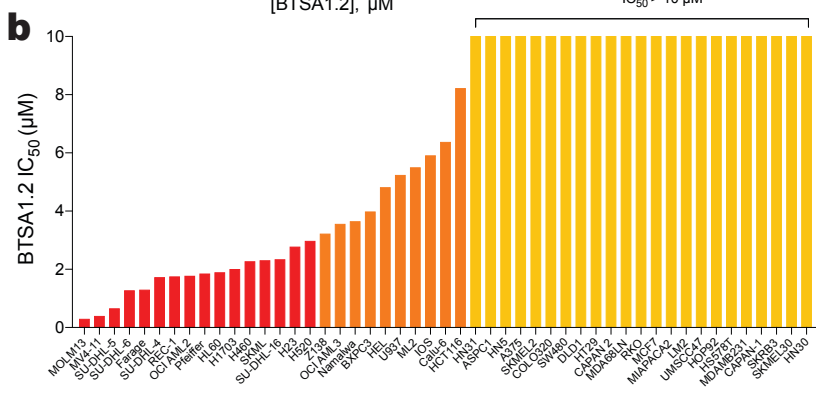

**Supplementary Figure 3. BTSA1.2 activity in a diverse collection of human cancer cell lines.**

**a,** Cell viability curves of diverse cell lines upon treatment with BTSA1.2 for 72hrs.

**b,** Bar graph plot of the cell viability  $IC_{50}$  ( $\mu M$ ) arranged by sensitivity, red  $IC_{50} < 3 \mu M$ ; orange  $3 < IC_{50} < 10 \mu M$ ; yellow  $IC_{50} > 10 \mu M$ . Data are mean  $\pm$  SD of three technical replicates from n=2 independent experiments. Source data are provided as a Source Data file.

**a**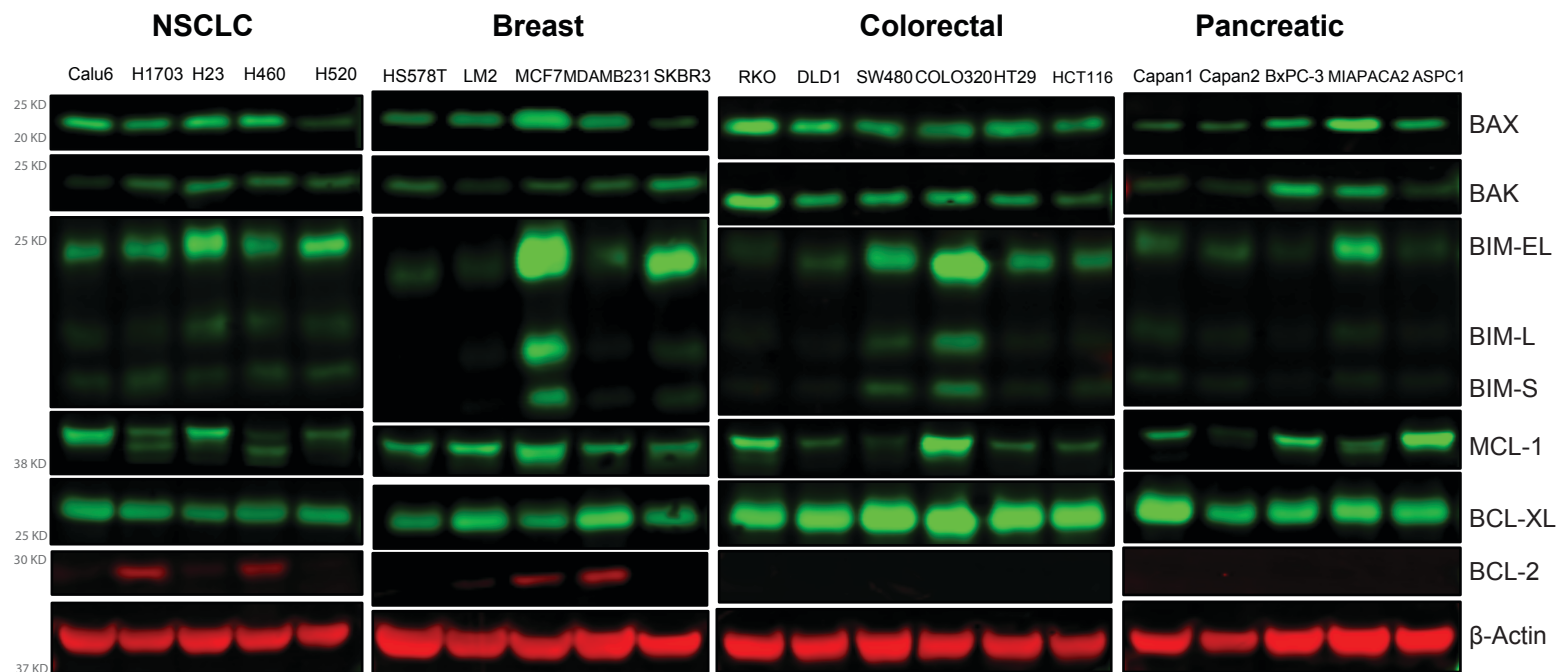**Leukemia****Lymphoma**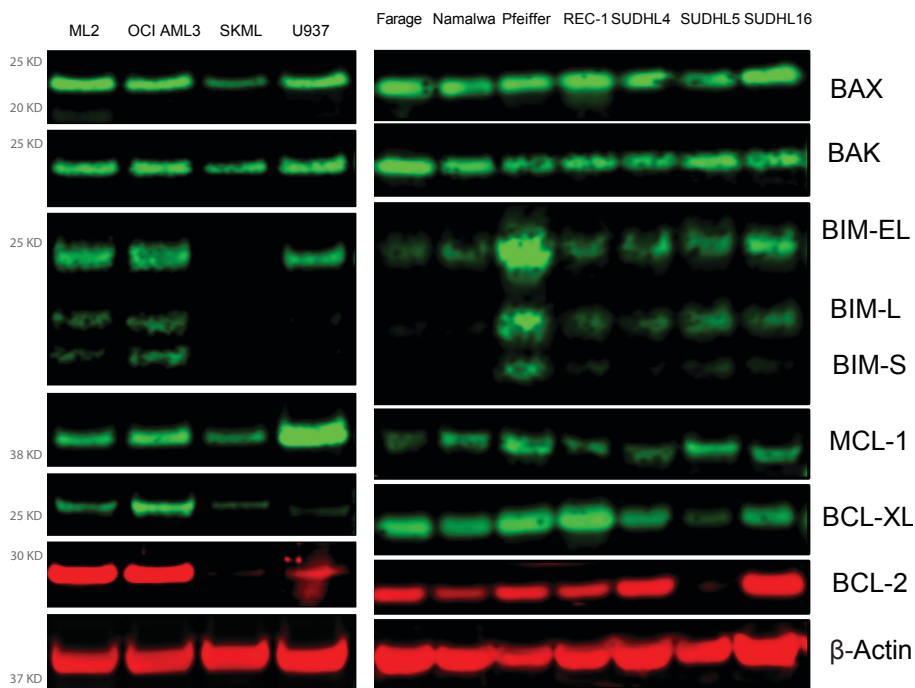**b**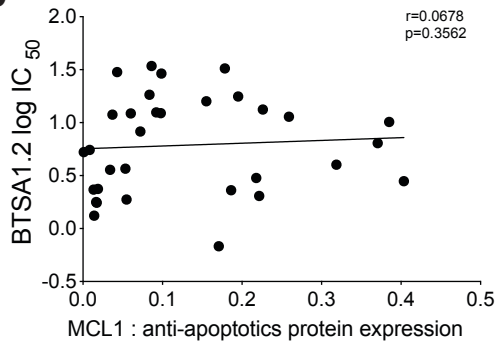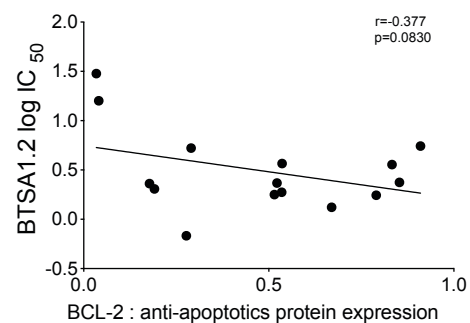**c**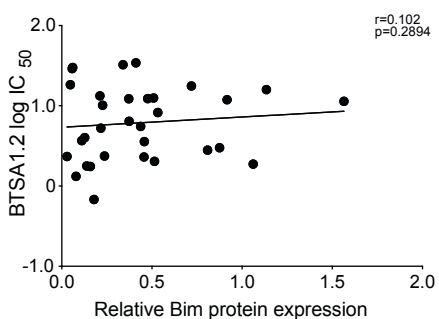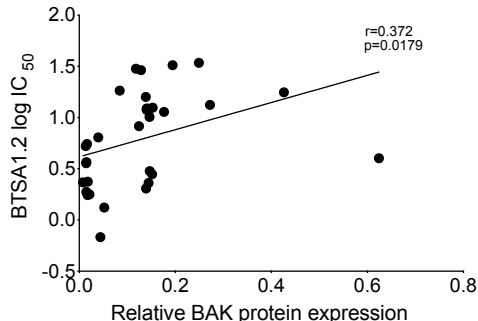**d**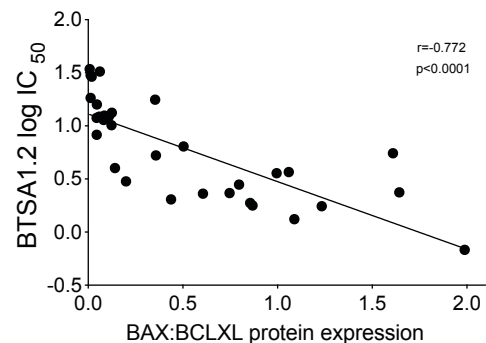



**Supplementary Figure 4. BCL-2 family protein expression levels in solid tumor and hematological cancer cell lines and correlation analysis of BTSA1.2 activity.**

**a**, Protein expression levels of key BCL-2 family members detected by Licor.  $\beta$ -Actin was used as loading control. **b-d**, Correlation of sensitivity to BTSA1.2 with **b**, MCL-1, BCL-2, **c**, BIM, BAK and **d**, BAX:BCL-XL relative protein levels using Pearson-Correlation. Relative protein levels were first normalized to  $\beta$ -Actin loading control, p value was calculated using two-tailed student t-test. Data are representative of at least n=2 independent experiments. Source data are provided as a Source Data file.

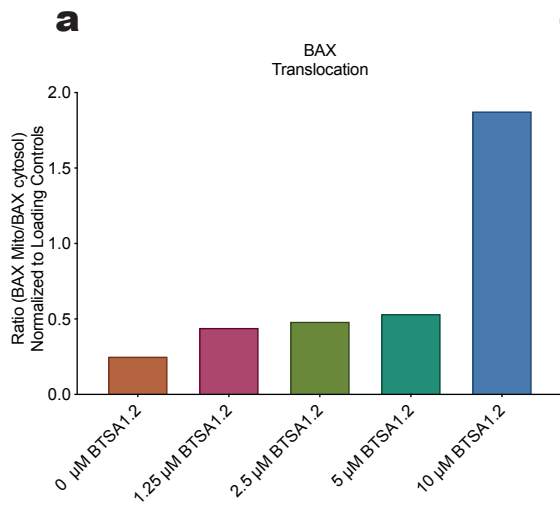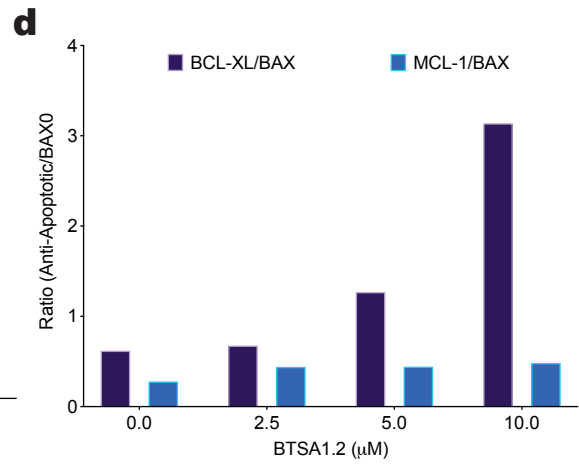

**b**

**c**

**e**

[BTSA1.2], μM

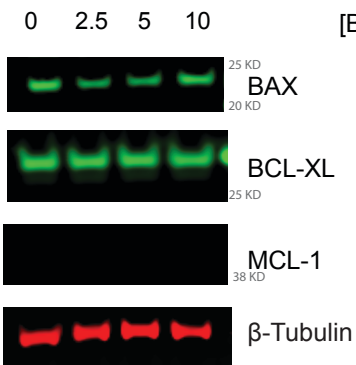

[BTSA1.2], μM

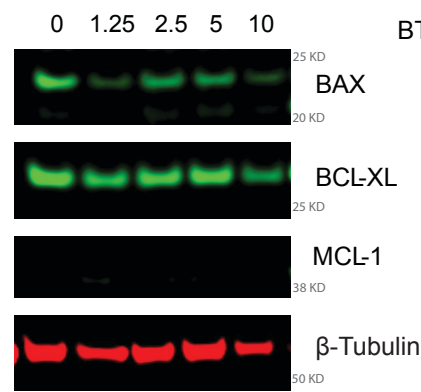

BTSA1.2 (μM)

10 % input BAX IP

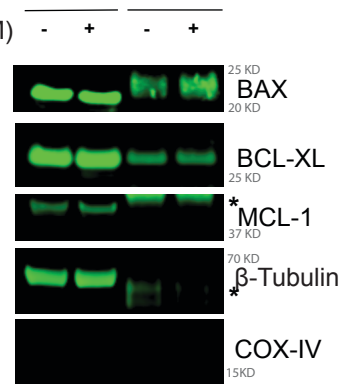

Cytosol Fraction

Cytosol Fraction

Cytosol fraction

Mitochondria Fraction

Mitochondria Fraction

Mitochondria fraction

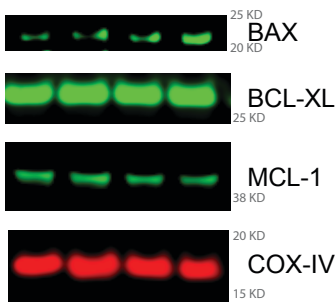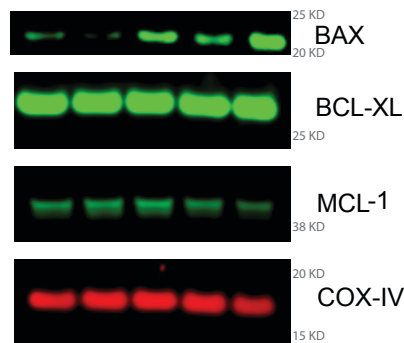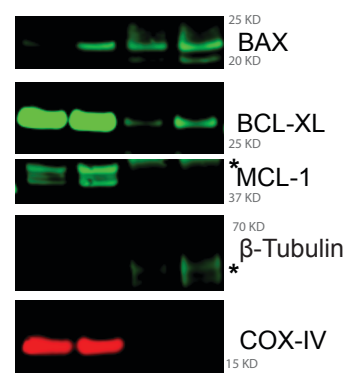

\* = IgG Heavy chain

**f**

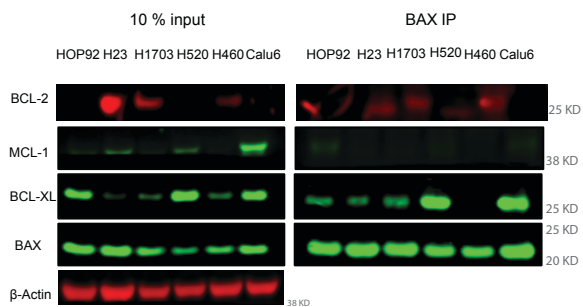

**g**

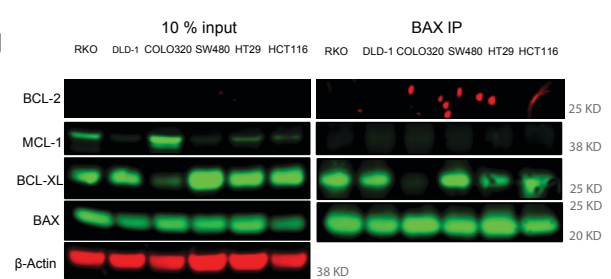

### **Supplementary Figure 5. BCL-XL regulates BAX activation by BTSA1.2**

**a**, Quantification of translocated BAX upon 4 hrs treatment with BTSA1.2 in BxPC-3 cell line (related to Fig. 1c). **b**, BAX translocation upon 4 hrs treatment with BTSA1.2 in SW480 cell line. **c**, BAX translocation upon 18 hrs treatment with BTSA1.2 in BxPC-3 cell line. **d**, Quantification of co-immunoprecipitated BAX with anti-apoptotic BCL-XL and MCL-1 upon 4 hrs treatment with BTSA1.2 in BxPC-3 cell line (related to Fig. 1d). **e**, Mitochondrial and cytosolic BAX co-IP upon 4 hrs treatment with 10  $\mu$ M BTSA1.2 in BxPC-3 cell line. Data are representative of at least n=3 independent experiments. Western blot analysis of BAX Co-IP in a panel of **f**, NSCLC and **g**, colorectal cells. Data are representative of n=3 independent experiments. Source data are provided as a Source Data file.

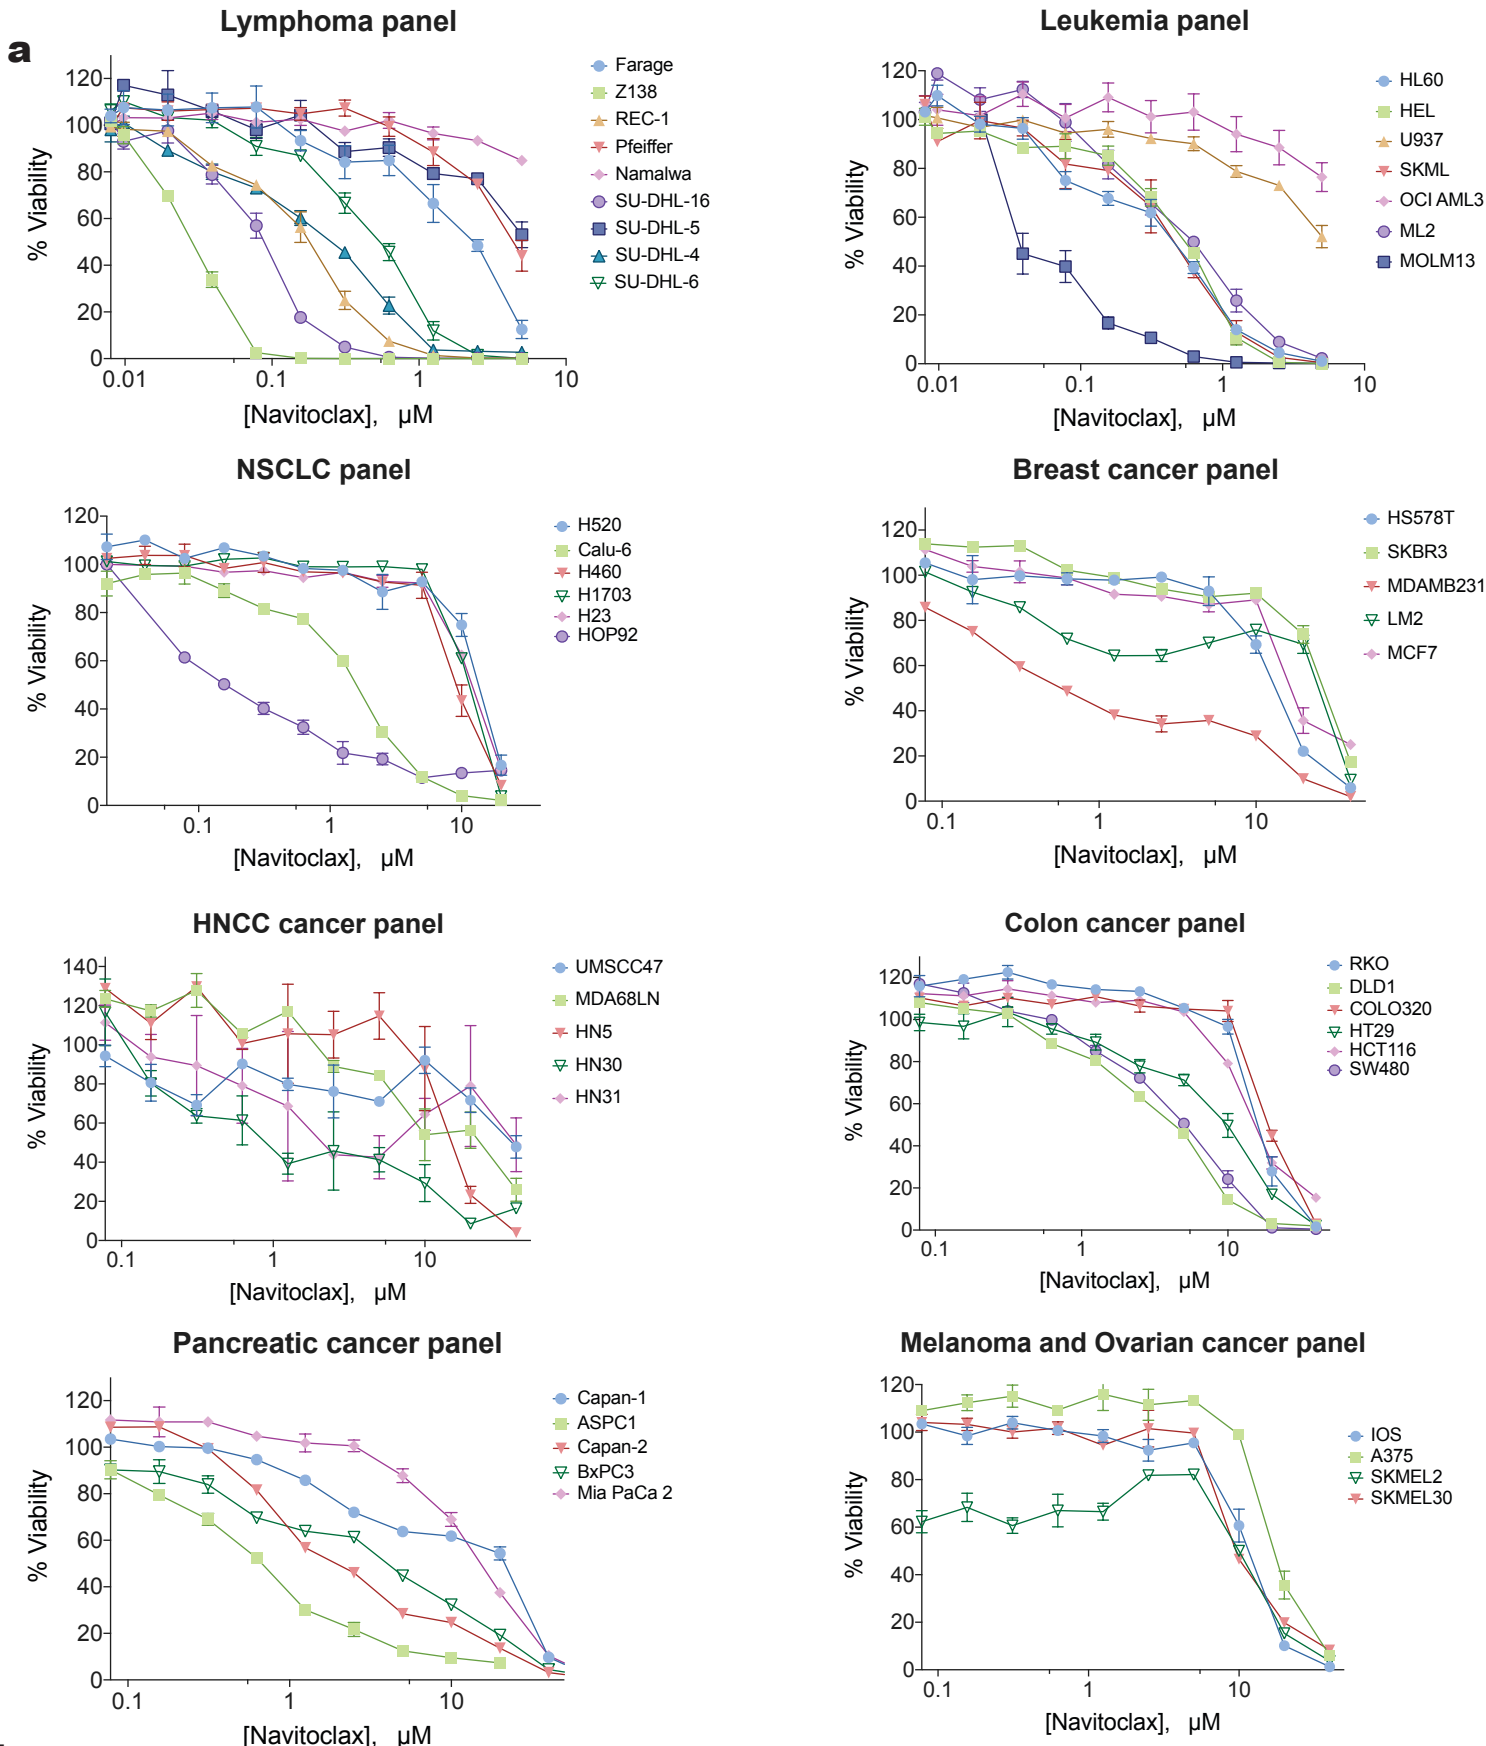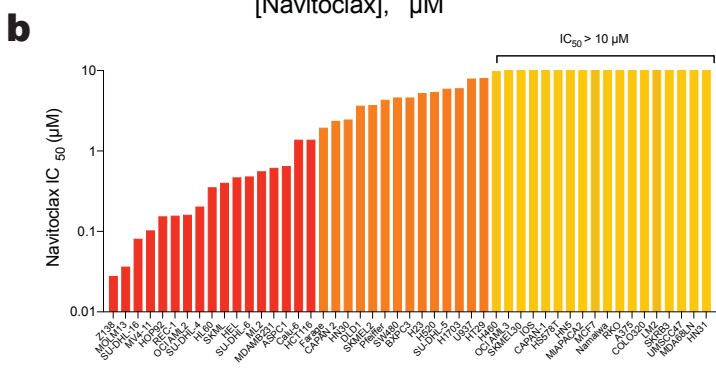

**C**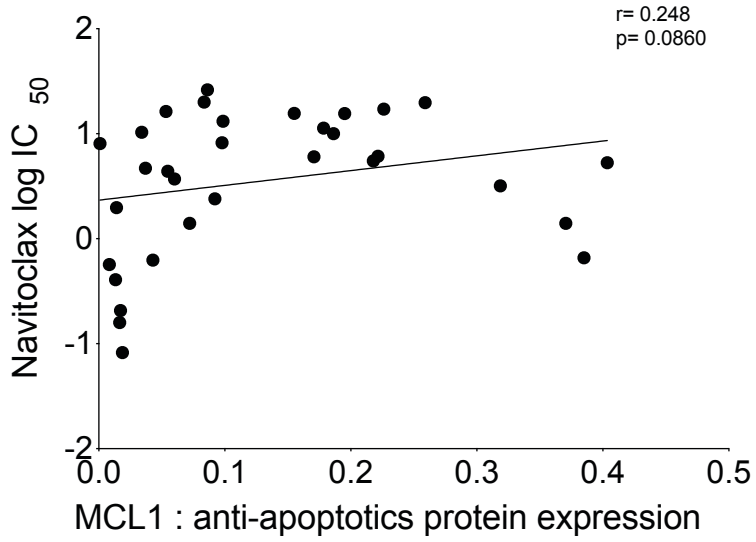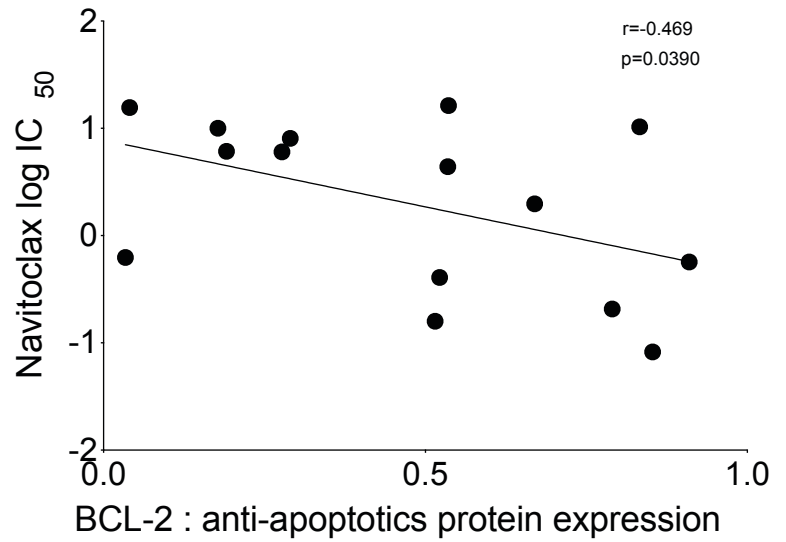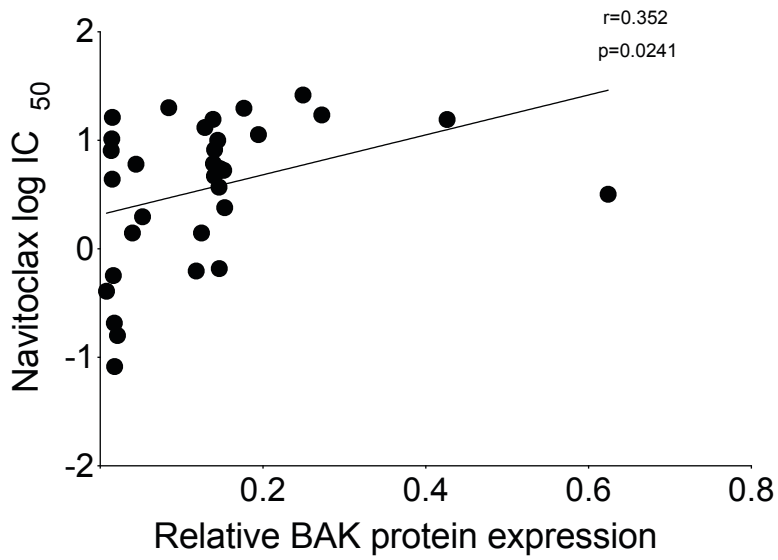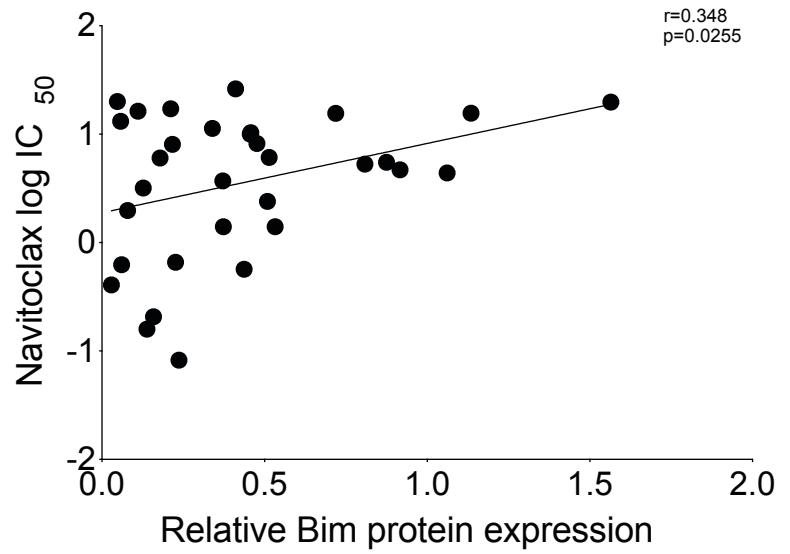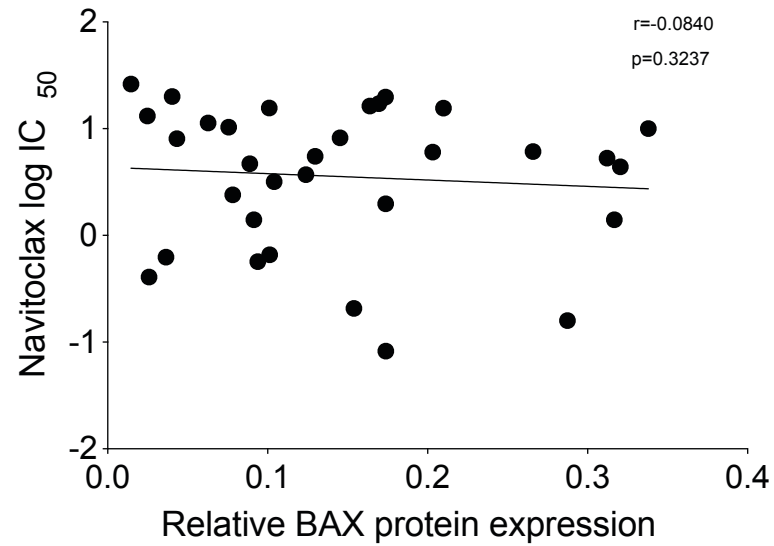

**Supplementary Figure 6. Navitoclax activity in a diverse collection of human cancer cell lines and correlation analysis of Navitoclax activity.**

**a**, Cell viability curves of cell lines upon treatment with Navitoclax for 72 hrs. Data are mean  $\pm$  SD of three technical replicates from n=2 independent experiments. **b**, Bar graph plot of the cell viability IC<sub>50</sub> ( $\mu$ M) arranged by sensitivity, red IC<sub>50</sub><1.5  $\mu$ M; orange 1.5<IC<sub>50</sub><10  $\mu$ M; yellow IC<sub>50</sub>>10  $\mu$ M. Correlation of sensitivity to Navitoclax with MCL-1, BCL-2, BIM, BAK and BAX relative protein levels using Pearson-Correlation. **c**, Relative protein levels were first normalized to  $\beta$ -Actin loading control, p value was calculated using student t-test. Source data are provided as a Source Data file.

**a**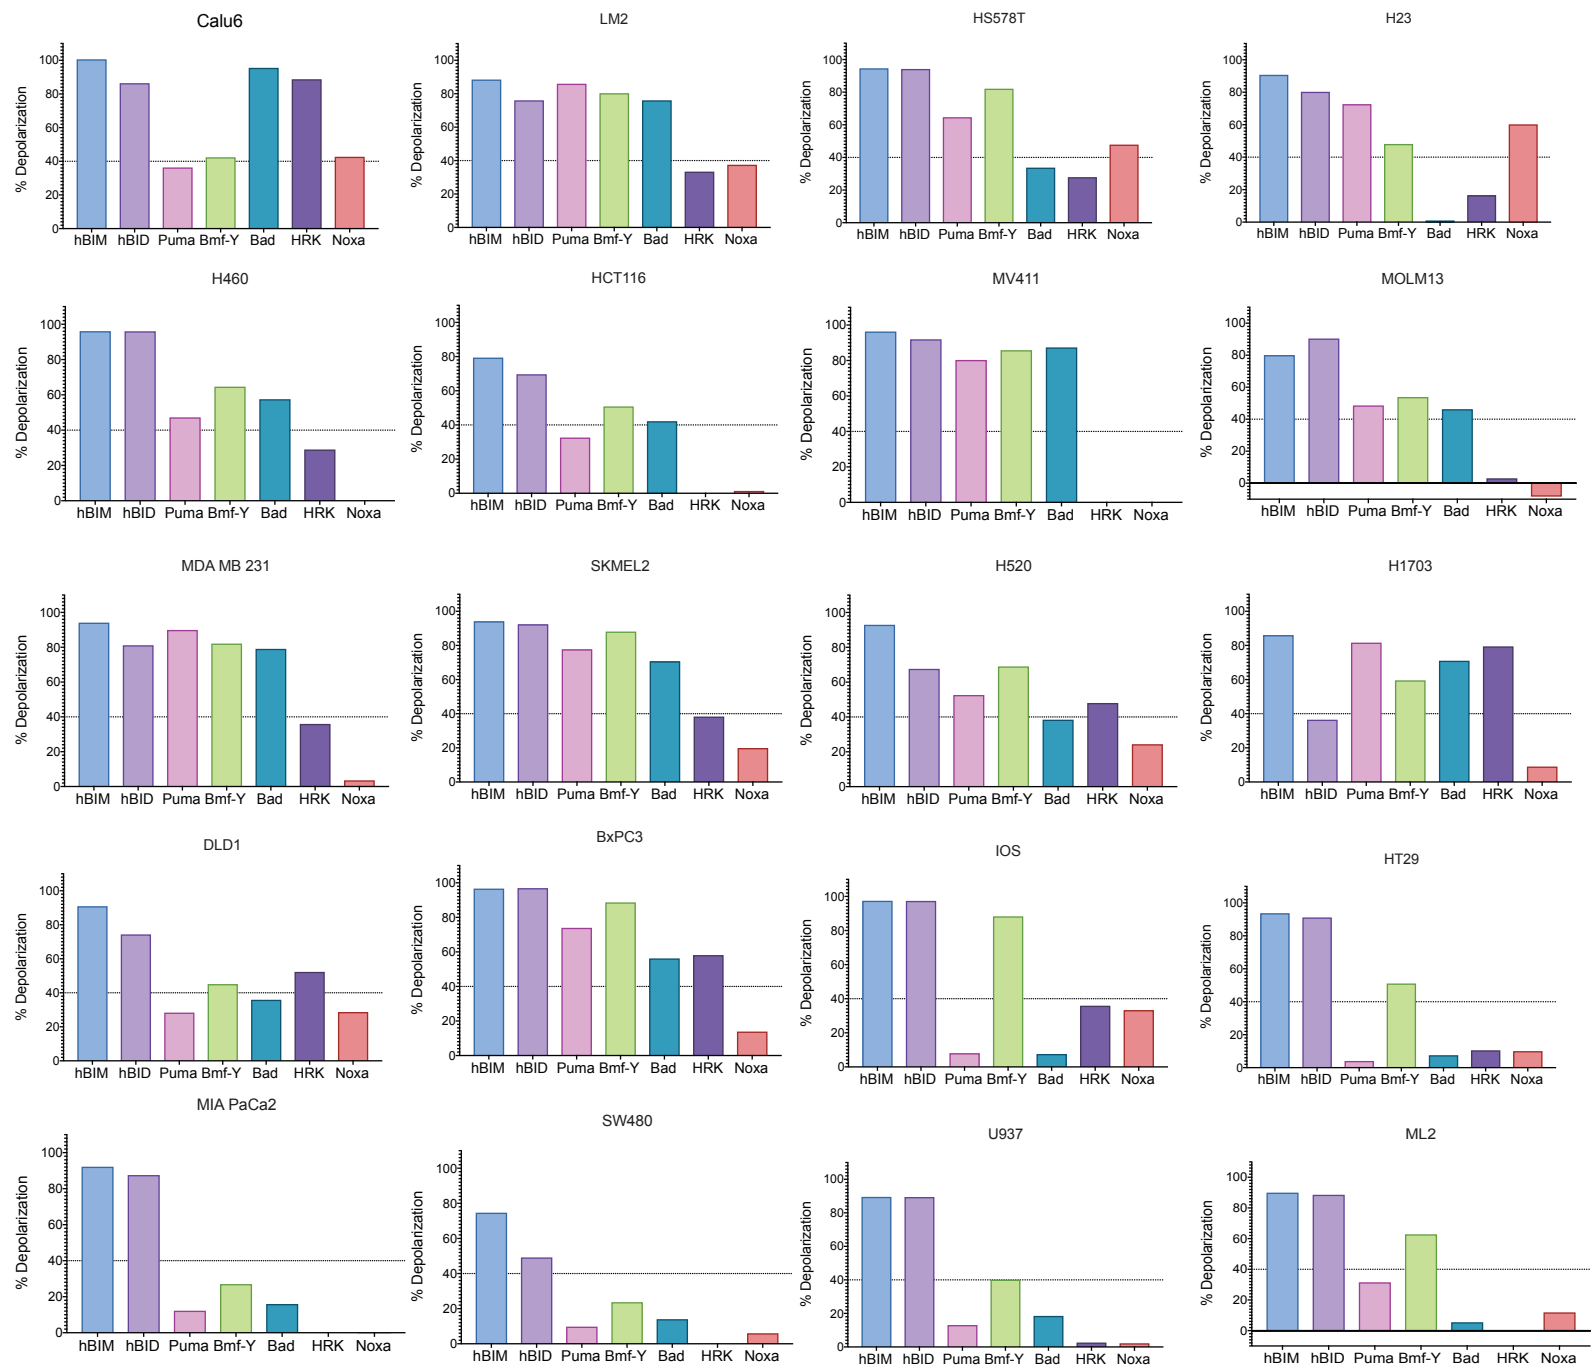**b**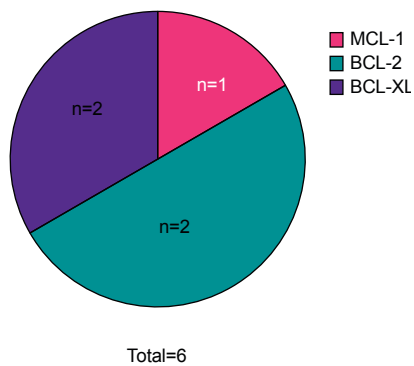**c**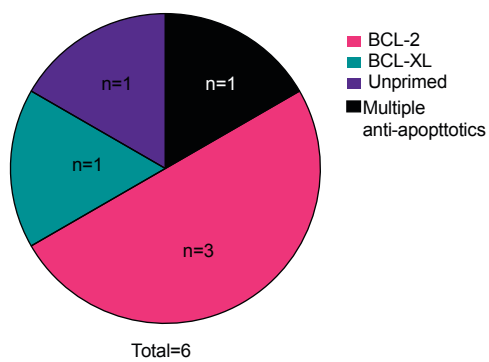**d**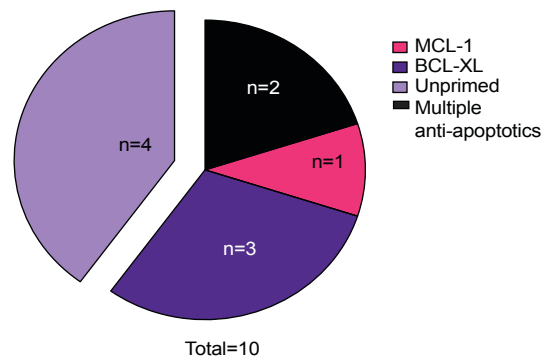

**Supplementary Figure 7. BH3-Profiling of solid tumor and hematological cancer cell lines.**

**a**, % Mitochondria depolarization upon treatment with BH3-only derived peptides. **b**, BH3 profiling predicts apoptotic blocks correlated with BTSA1.2 sensitivity. Data are mean from n=3 replicates **c**, BH3-profiling predicts apoptotic blocks correlated with Navitoclax sensitivity. **d**, BH3-profiling predicts apoptotic blocks correlated with BTSA1.2 and Navitoclax resistance. Source data are provided as a Source Data file.



**a**

# Hematological

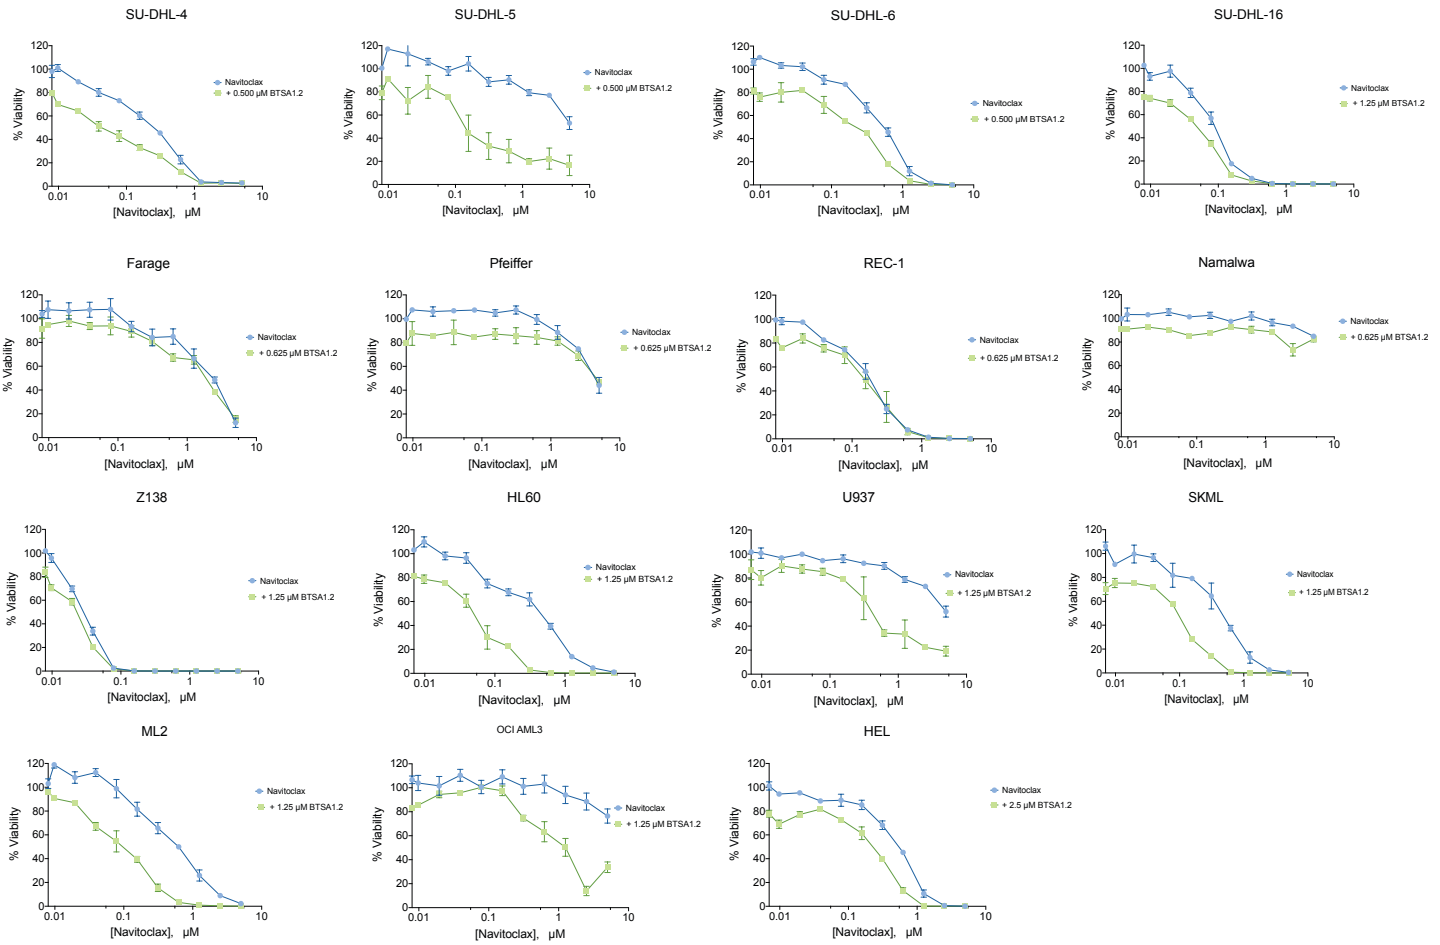

# Solid tumors (NSCLC, Colorectal, Melanoma and Ovarian)

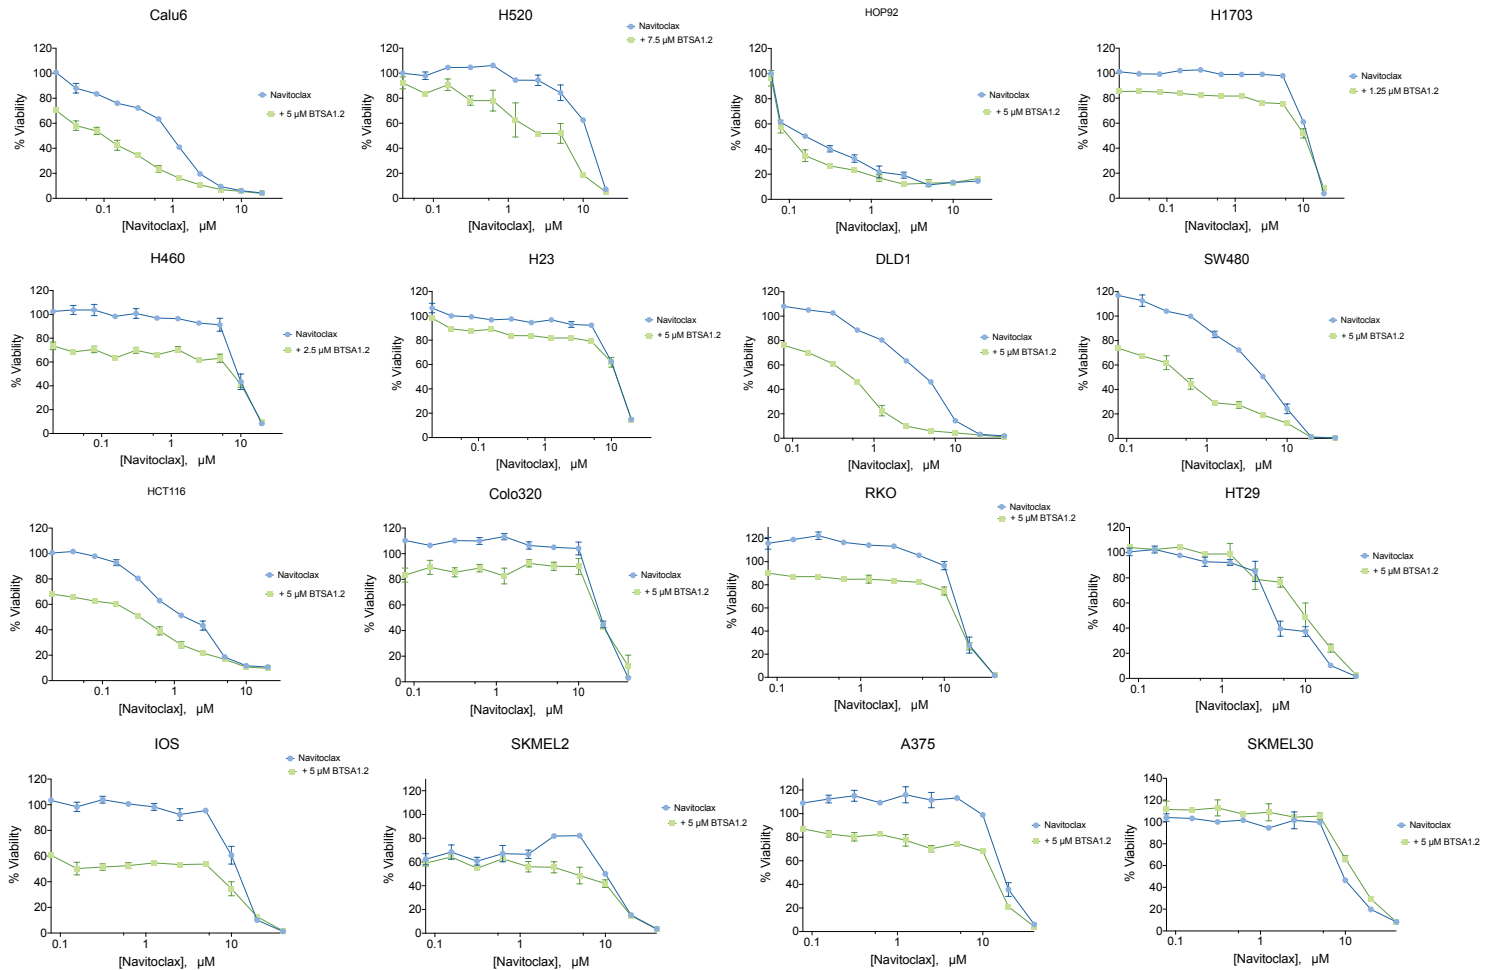

# Solid tumors (Pancreatic, Breast, HNCC)

ASPC1

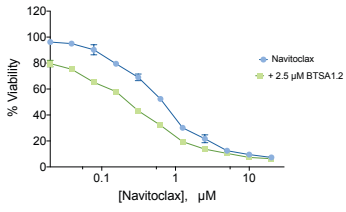

BxPC-3

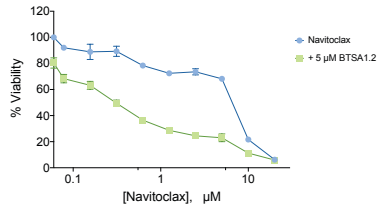

Mia PaCa 2

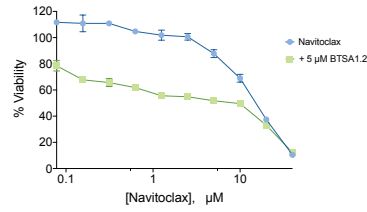

Capan-1

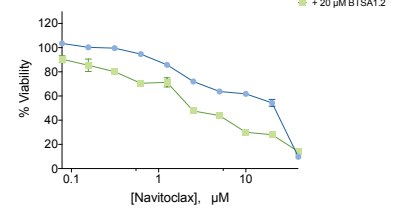

Legend: Navitoclax (blue diamond), + 20 µM BTS1.2 (green square)

Capan-2

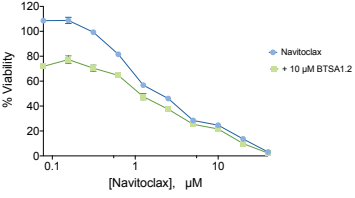

HS578T

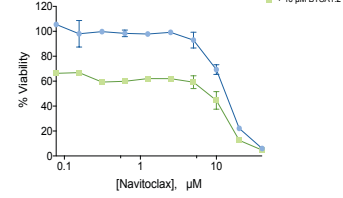

SKBR3

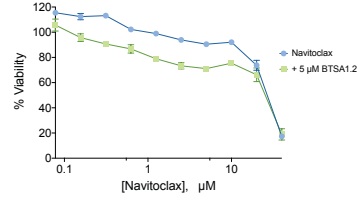

LM2

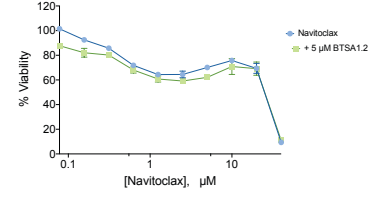

Legend: Navitoclax (blue diamond), + 5 µM BTS1.2 (green square)

MCF7

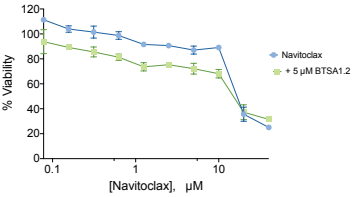

MDA MB 231

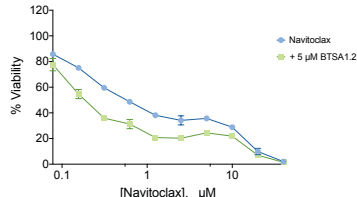

UMSCC47

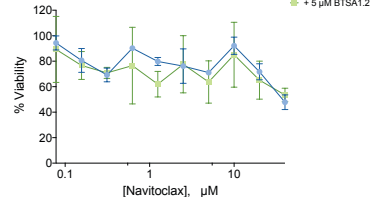

MDA686LN

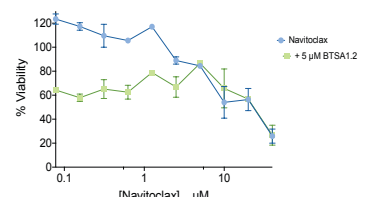

Legend: Navitoclax (blue diamond), + 5 µM BTS1.2 (green square)

HN30

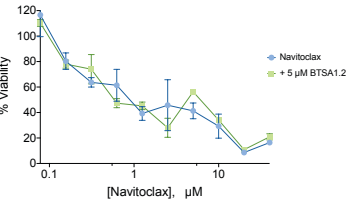

HN5

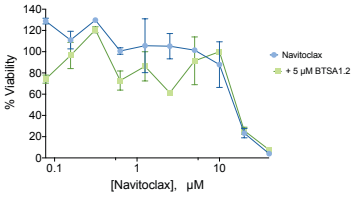

HN31

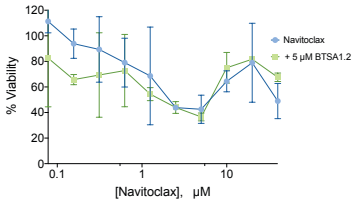

Legend: Navitoclax (blue diamond), + 5 µM BTS1.2 (green square)

**Supplementary Figure 8. BTSA1.2 and Navitoclax combination to inhibit cell viability in resistant tumor cell lines.**

a, Viability curves of cell lines treated with Navitoclax in combination with a constant sensitizing concentration (induce <20% viability loss) of BTSA1.2 (corresponding to Fig. 2a,b). Data are mean  $\pm$  SD of three technical replicates from n=2 independent experiments. Source data are provided as a Source Data file.

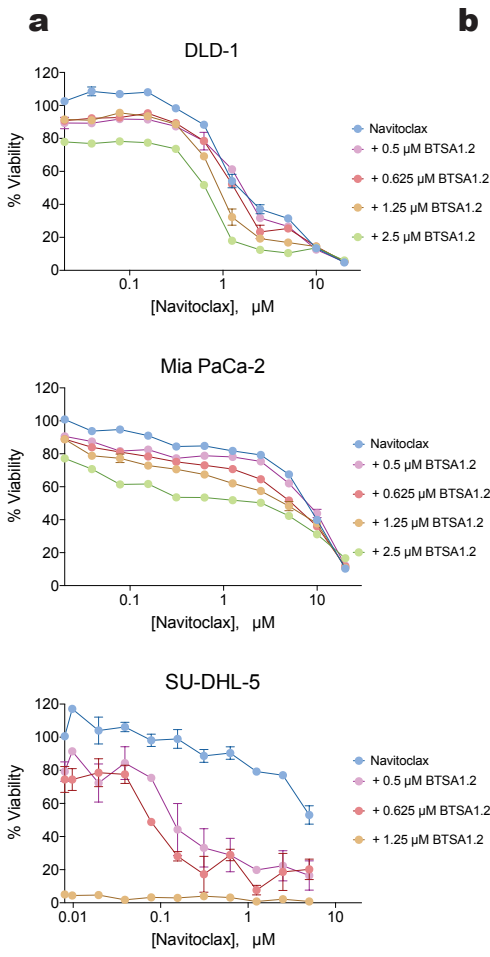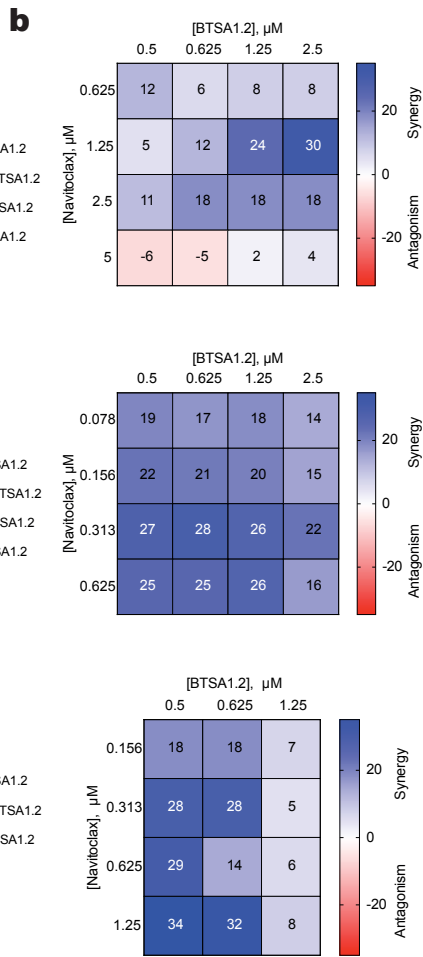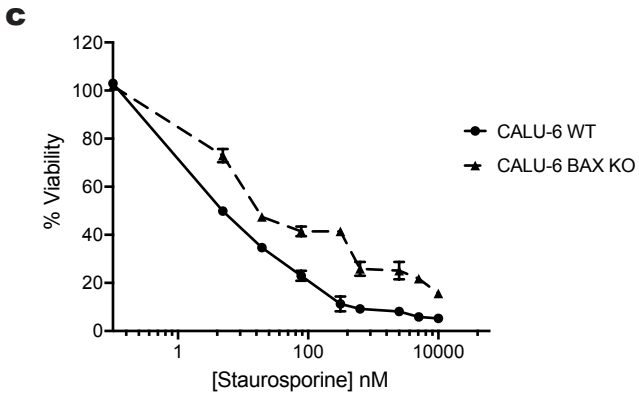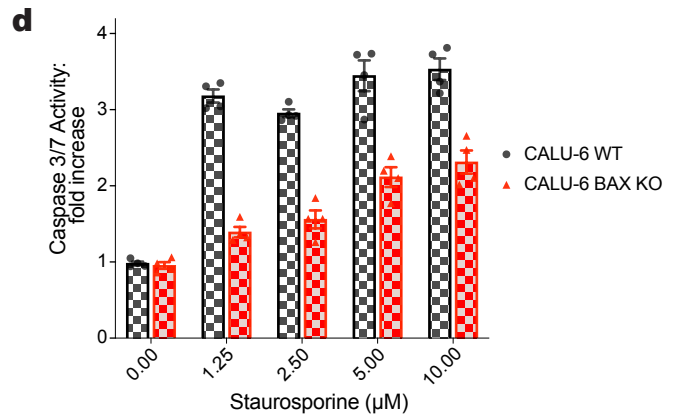

**Supplementary Figure 9. BTSA1.2 and Navitoclax synergize to inhibit cell viability in resistant tumor cell lines.**

**a**, Dose-response curves of Navitoclax in the presence of various doses of BTSA1.2 in a panel of resistant cancer cell lines to single agents from various tissue types (Colon=DLD1, Pancreatic=Mia PaCa-2, Lymphoma=SU-DHL-5). Effects on cell viability were measured by CellTiter-Glo after 72 hrs of treatment. **b**, Bliss synergy score heat map from combinatorial treatment of BTSA1.2 and Navitoclax in different cancer tissue types. Data are mean  $\pm$  SD of three technical replicates from n=3 independent experiments. **c**, Cell viability at 72 hrs in WT and CRISPR/Cas9 BAX KO Calu-6 cell lines treated with various doses of Staurosporine. **d**, Caspase 3/7 activity in WT and CRISPR/Cas9 BAX KO Calu-6 cell lines at 24 hrs treatment with various doses of Staurosporine. Data are mean  $\pm$  SD of four technical replicates from n=3 independent experiments. Source data are provided as a Source Data file.

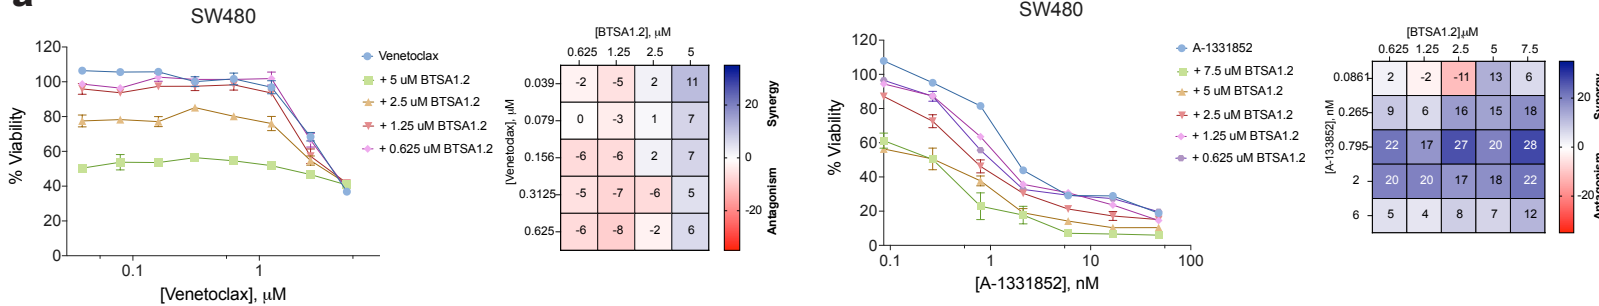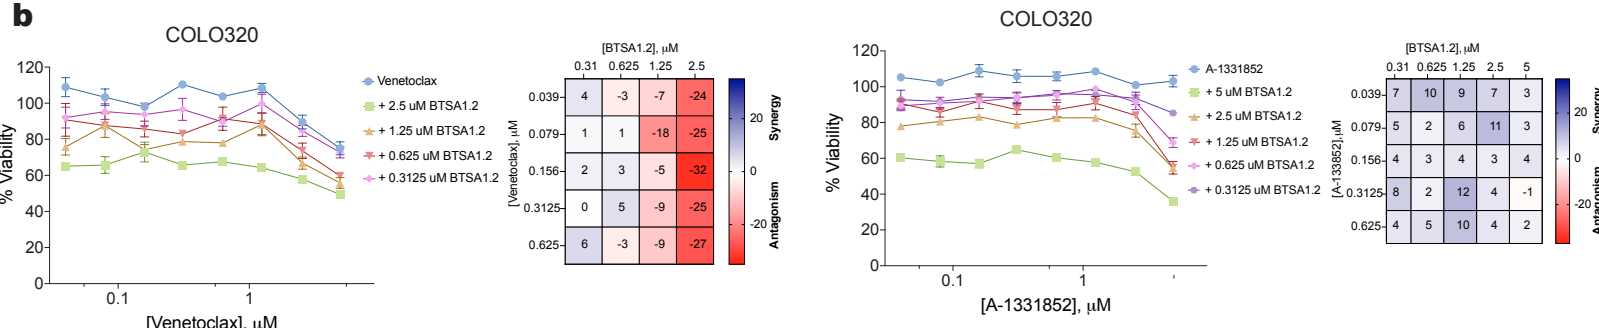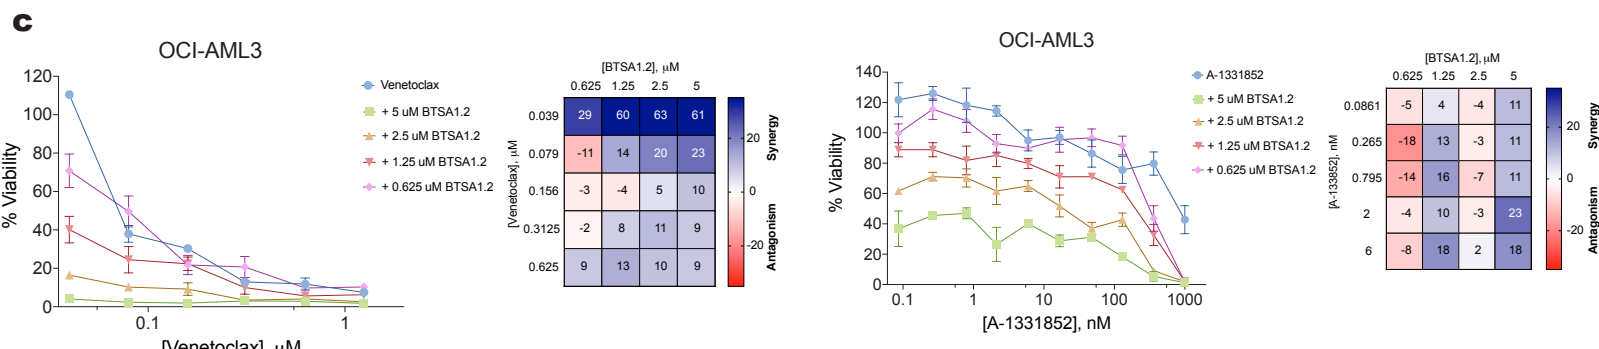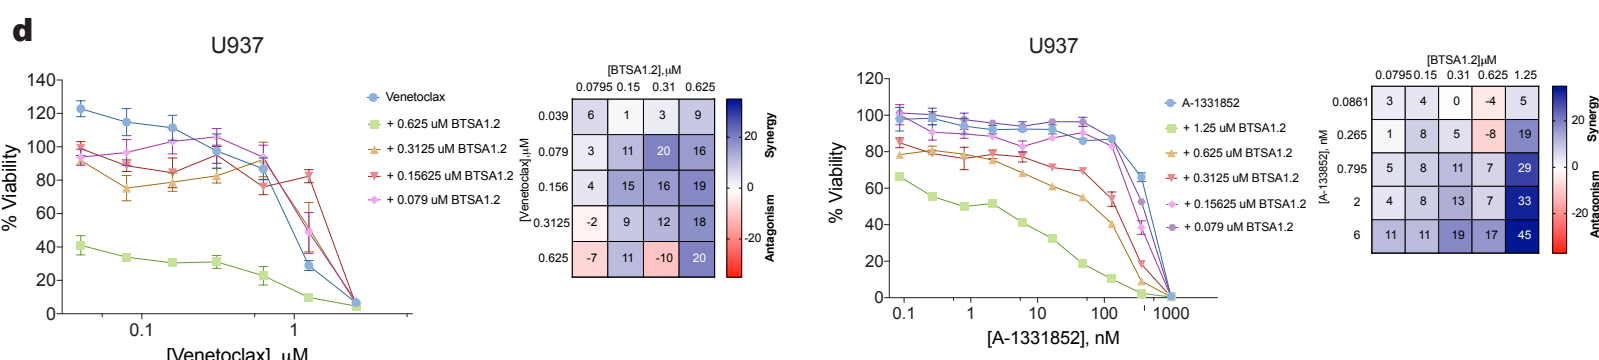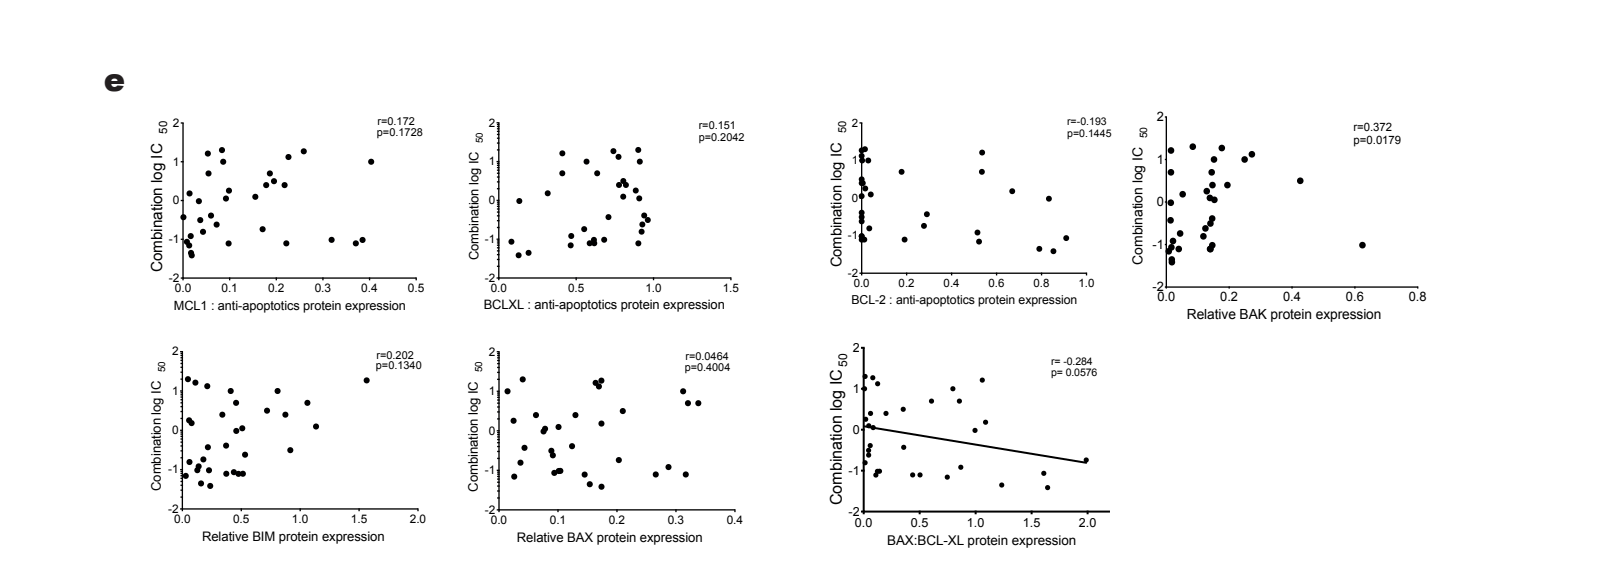

**Supplementary Figure 10. BTSA1.2 and BCL-XL selective inhibitor A1331852 synergize to inhibit cell viability in sensitive tumor cell lines to the Navitoclax/BTSA1.2 combination.**

**a,b**, Dose-response curves of the BCL-XL selective inhibitor A1331852 or the BCL-2 selective inhibitor Venetoclax in the presence of various doses of BTSA1.2 in a sensitive (SW480) or resistant (COLO-320) cancer cell line to the Navitoclax/BTSA1.2 combination. Effects on cell viability were measured by CellTiter-Glo after 72 hrs of treatment. Bliss synergy score heat map from combinatorial treatment. Data are mean  $\pm$  SD of three technical replicates from n=3 independent experiments. **c,d**, Dose-response curves of the BCL-XL selective inhibitor A1331852 or the BCL-2 selective inhibitor Venetoclax in the presence of various doses of BTSA1.2 in OCI-AML3 or U937 hematologic cell line sensitive to the Navitoclax/BTSA1.2 combination. Effects on cell viability were measured by CellTiter-Glo after 72 hrs of treatment. Bliss synergy score heat map from combinatorial treatment. Data are mean  $\pm$  SD of three technical replicates from n=3 independent experiments. **e**, BCL-2 family protein levels compared with sensitivity to the BTSA1.2 and Navitoclax combination: Protein expression levels correlation with Combination. Correlation of sensitivity to BTSA1.2 and Navitoclax combination with MCL-1, BCL-XL BCL-2, BIM, BAK and BAX relative protein levels using Pearson-Correlation. Relative protein levels were first normalized to b-Actin loading control, p value was calculated using student t-test. Data are representative of at least n=2 independent experiments. Source data are provided as a Source Data file.

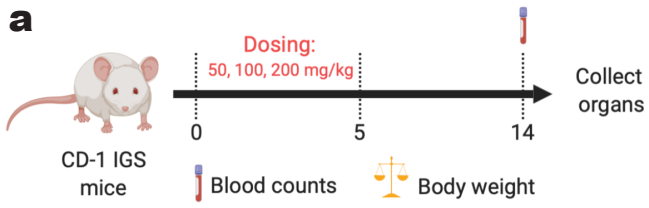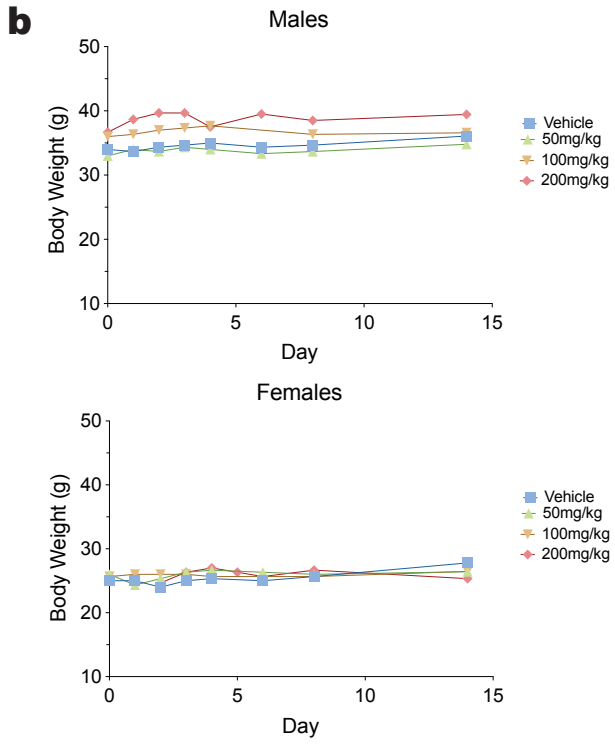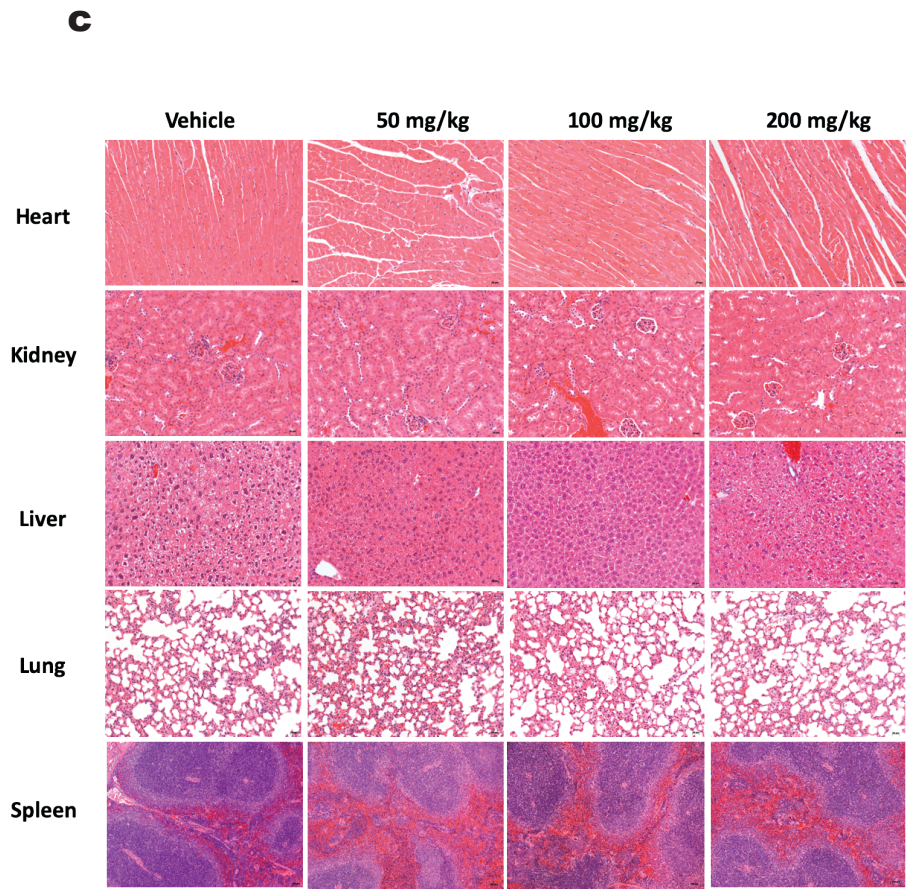



**Supplementary Figure 11. Maximum tolerated dose analysis of BTSA1.2.**

**a**, BTSA1.2 is well-tolerated *in vivo*: Schematic of MTD and toxicity study of BTSA1.2. CD-IGS female and male mice were treated daily with increasing concentration of BTSA1.2 orally administered for 5 days. Body weights and blood counts were measured at indicated days. Mice were sacrificed 14 days after the first treatment and organs were collected for pathology analysis. **b**, Body weight measurements of CD1-IGS mice after treatment with vehicle or BTSA1.2. Data in **a** and **b** are mean  $\pm$  SD from n=6 mice. **c**, Representative tissue sections spleen, heart, liver, lungs and kidney using Hematoxylin and Eosin (H&E) staining from mice after treatment of vehicle or BTSA1.2. Scale bars, 100  $\mu$ m. Data is representative of n=3 independent samples per group. Source data are provided as a Source Data file.

**a**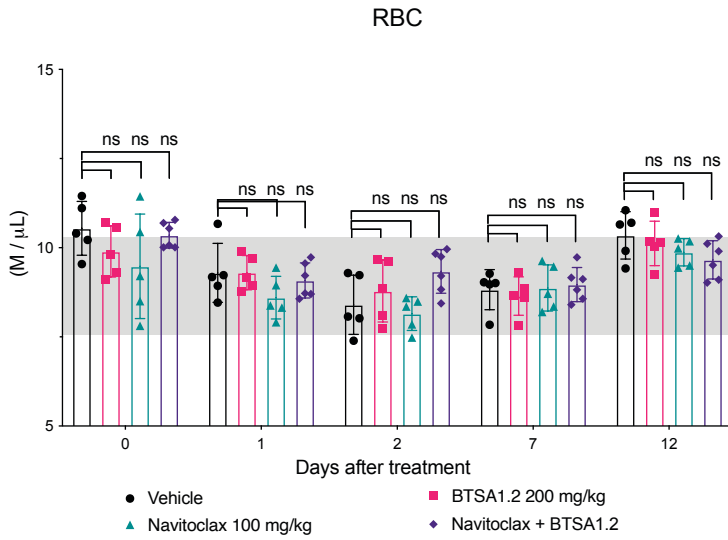**b**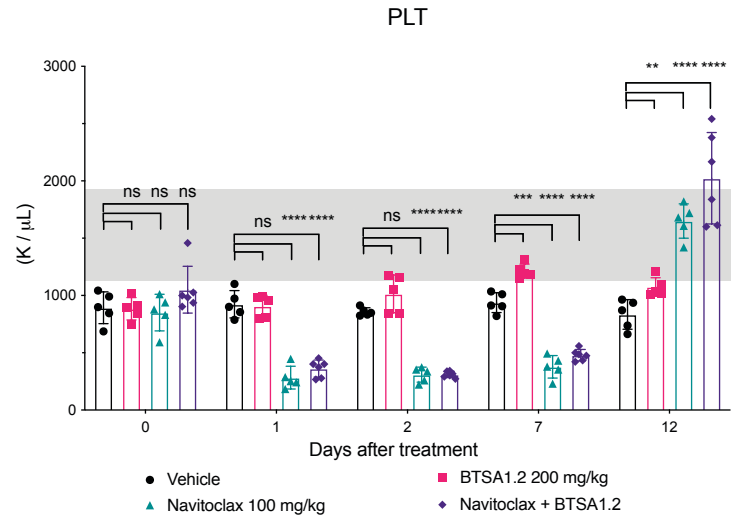**c**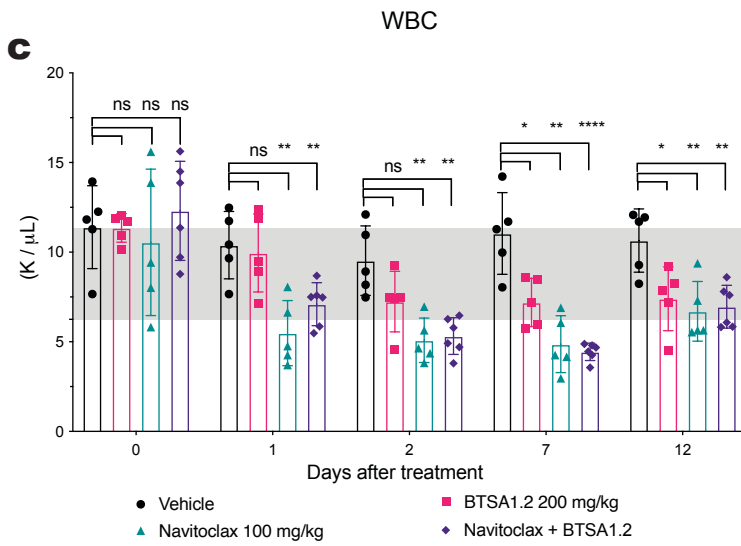**d**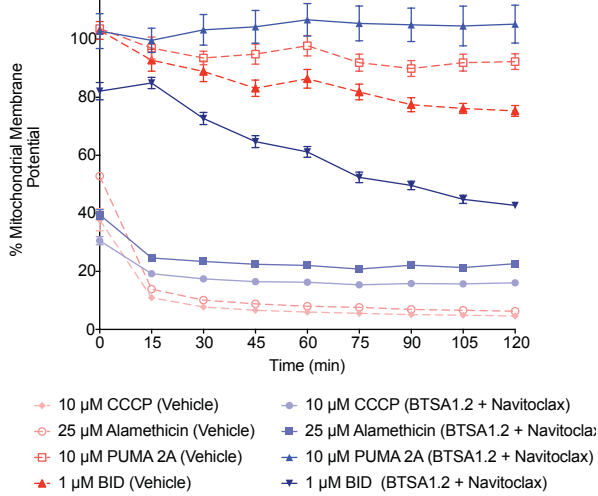**e**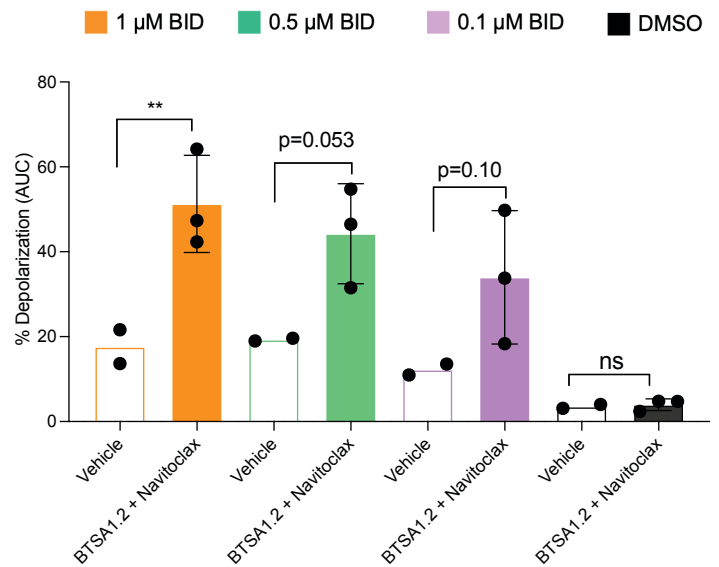

**Supplementary Figure 12. Combinatorial therapy of BTSA1.2 and Navitoclax is well tolerated *in vivo*, does not enhance Navitoclax driven toxicity in the hematopoietic system and primes tumors *in vivo* to apoptosis.**

**a-c**, Combinatorial therapy of BTSA1.2 and Navitoclax is well tolerated *in vivo*: Counts of peripheral **a**, red blood cells; **b**, platelets; and **c**, white blood cells in CD1-IGS mice treated with vehicle, 100 mg/kg Navitoclax, 200 mg/kg BTSA1.2 or the combination 0, 1, 2, 7 and 12 days after treatment. Data in **a-c** represents mean  $\pm$  SD from n = 5 mice in Vehicle, BTSA1.2 and Navitoclax and n=6 mice in Combination groups. Statistics for these panels were obtained using one-way ANOVA: \*, p<0.05; \*\*, p<0.01; \*\*\*, p<0.001; \*\*\*\*, p<0.0001. **d,e**, Dynamic BH3 profiling of tumors from mice treated with vehicle or Navitoclax and BTSA1.2 combination: **d**, Example of kinetic curve of mitochondria potential in tumors treated with vehicle or combination upon stimuli of BH3-BID peptide, Puma2A, CCCP or Alamethicin. Data represent mean  $\pm$  SD of three replicates from n=2 independent experiments. **e**, Bar graph represent % of mitochondria depolarization of tumor cells detected by JC-1 upon treatment BH3-BID derived peptide or DMSO. Data represent mean  $\pm$  SD from n = 2 mice in Vehicle and n=3 mice in Combination groups. Statistics for this panel were obtained using one-way Anova: \*, p<0.05; \*\*, p<0.01; \*\*\*, p<0.001; \*\*\*\*, p<0.0001. Source data are provided as a Source Data file.

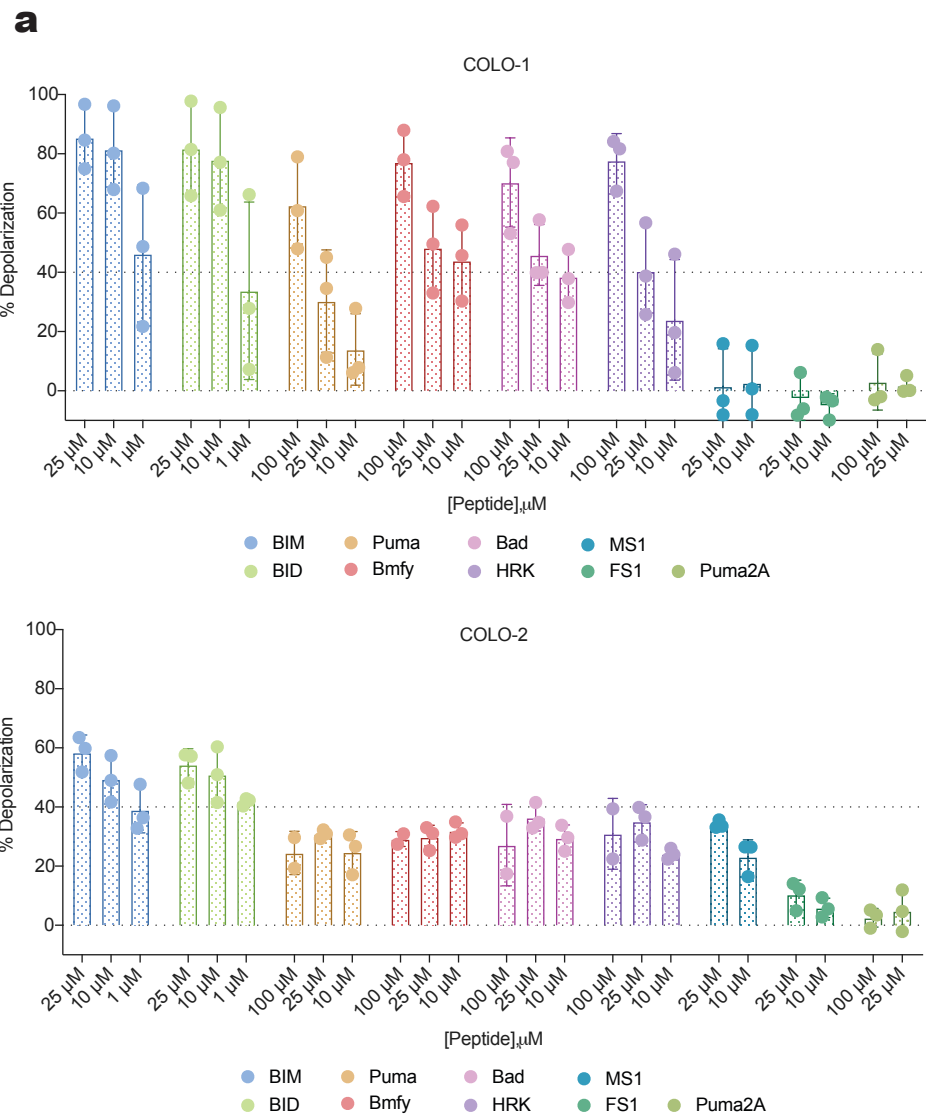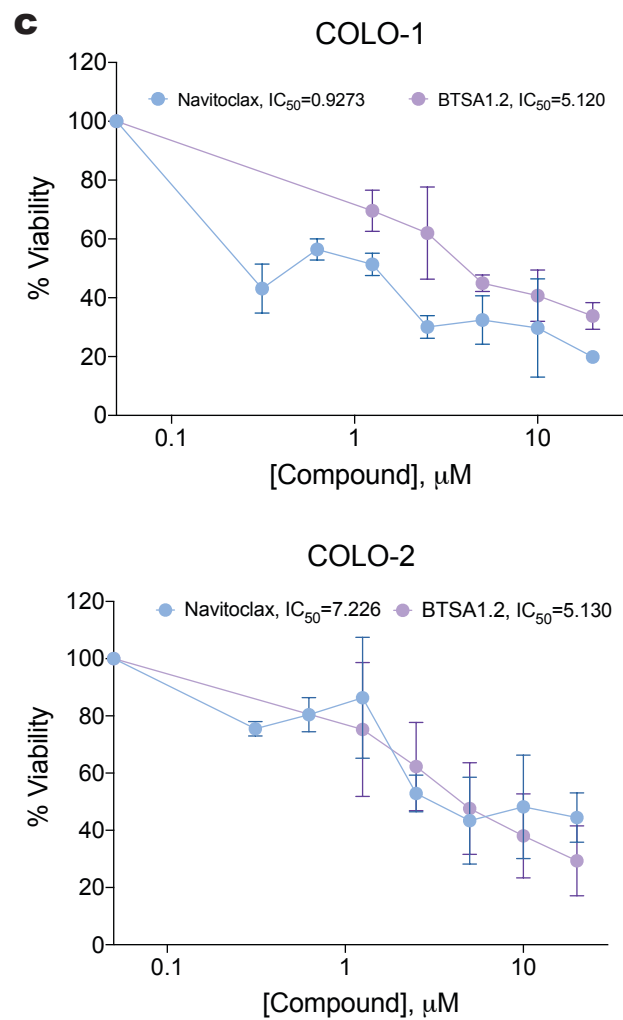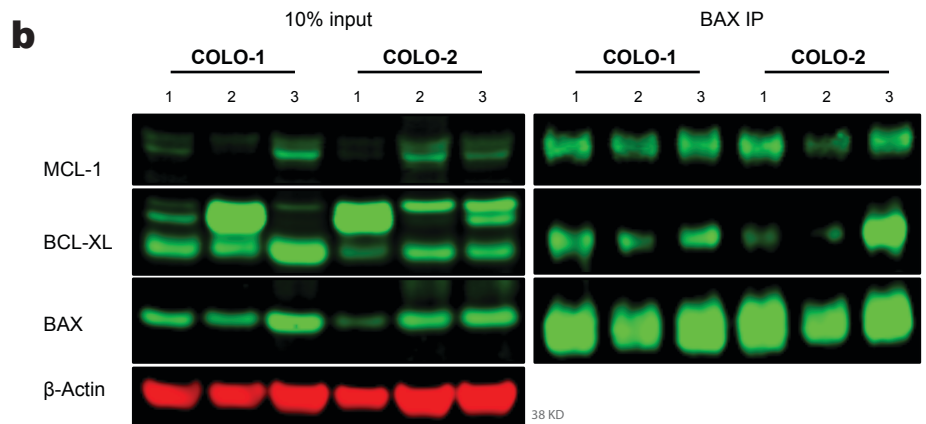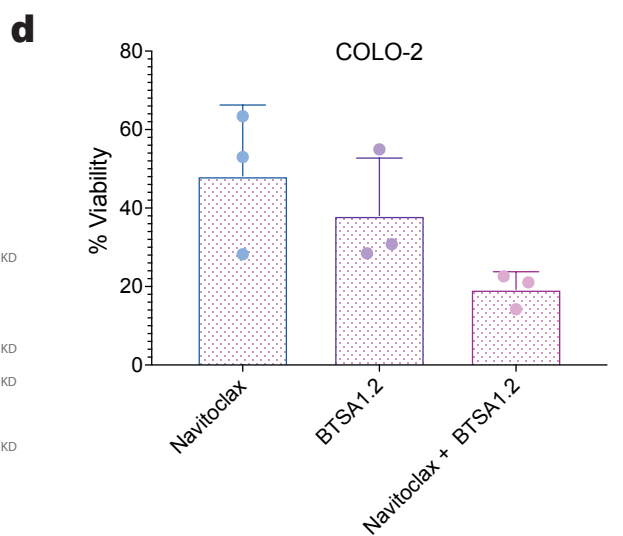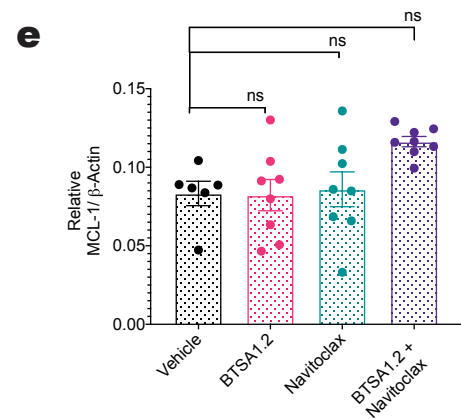

### **Supplementary Figure 13. Characterization of colorectal PDX.**

**a**, BH3-profile of two colorectal PDXs. Bar graph represent % of mitochondria depolarization of isolated tumor cells detected by JC-1 upon treatment BH3-derived peptides. Data represent mean  $\pm$  SD of three replicates from n=3 mice. **b**, Western blot analysis of BAX Co-IP in colorectal PDX tumors. Blot is representative of n=3 independent experiments. **c**, Cell viability of COLO-1 and COLO-2 PDX isolated cells after 24 hrs treatment with Navitoclax or BTSA1.2. **d**, Cell viability of COLO-2 PDX isolated cells after 24 hrs treatment with 10  $\mu$ M Navitoclax, 10  $\mu$ M BTSA1.2 or combination. Data represent mean  $\pm$  SD of three replicates from n=3 independent experiments. **e**, Relative MCL-1 levels of COLO-1 tumors. Relative protein levels were normalized to  $\beta$ -Actin loading control. Data represent mean  $\pm$  SD from n=6 mice (vehicle) and from n=8 mice (BTSA1.2, Navitoclax, Combination). Source data are provided as a Source Data file.

**a**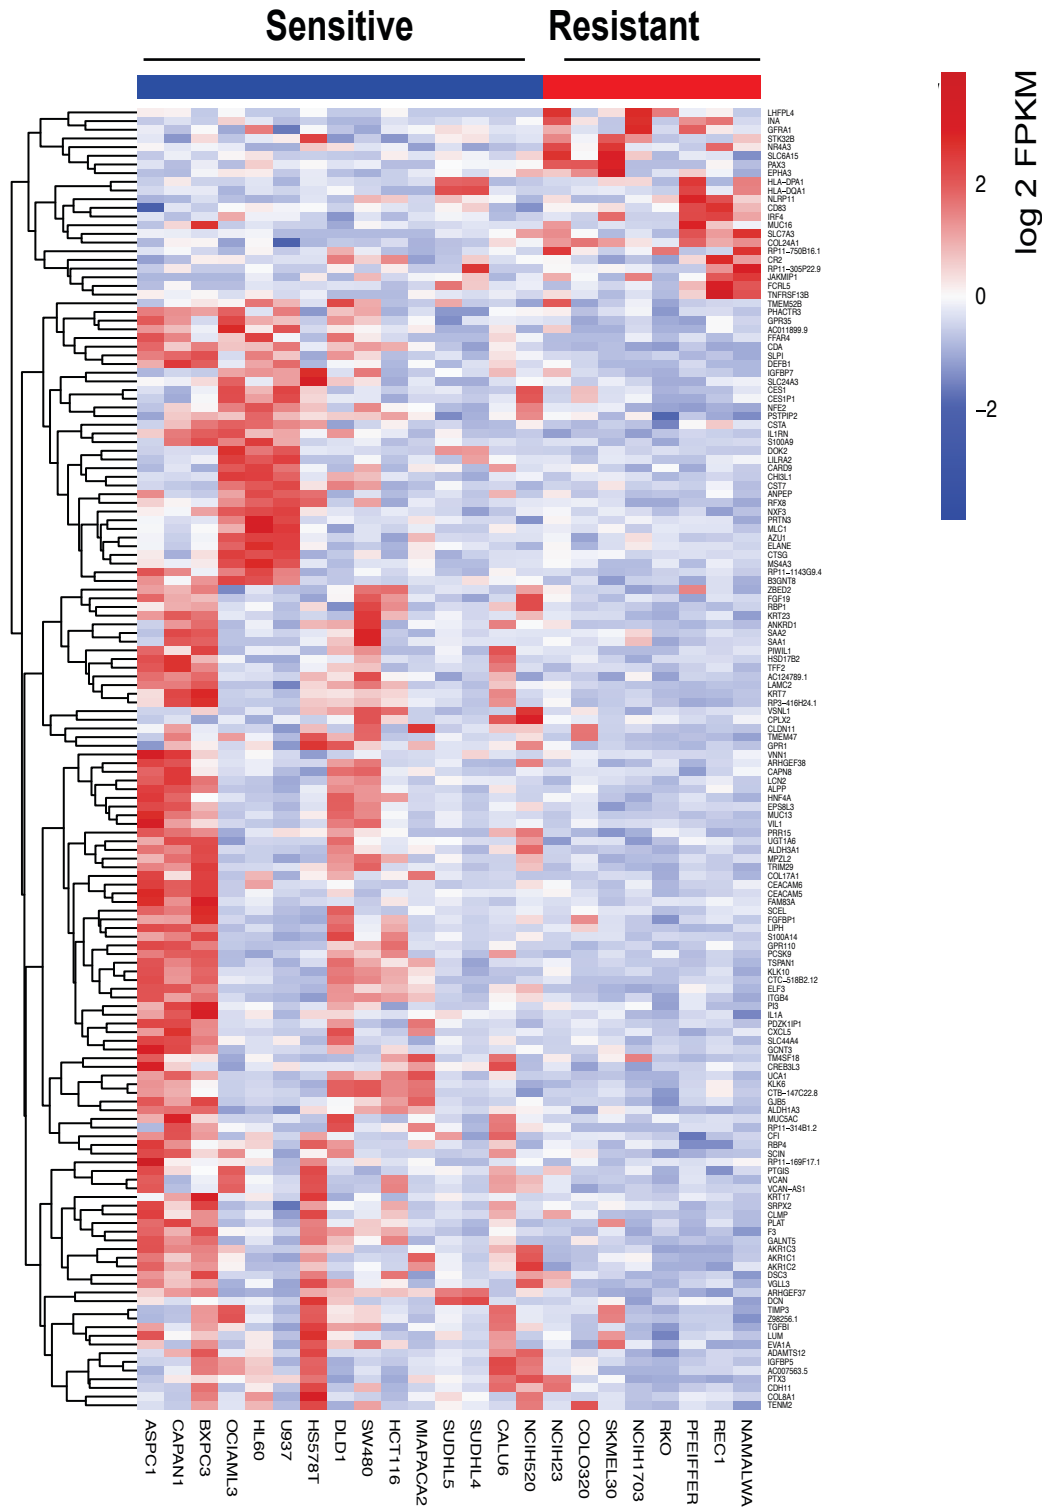**b**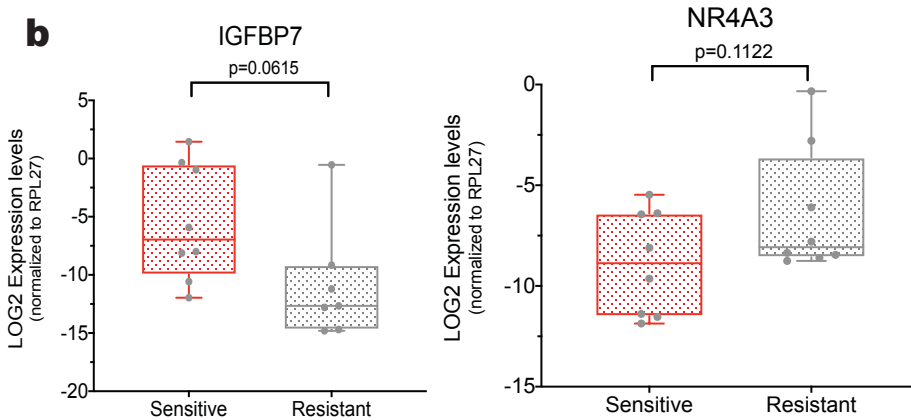**c**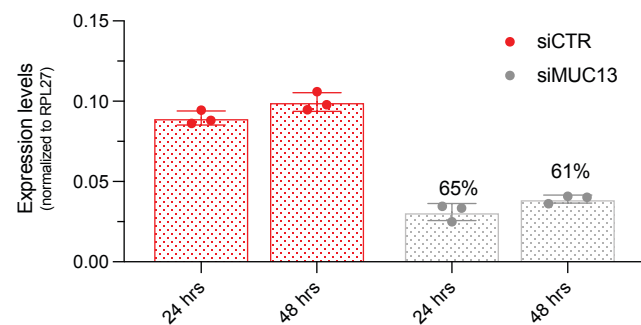

**Supplementary Figure 14. Predictive biomarkers for Navitoclax and BTSA1.2 combination sensitivity.**

**a**, Heatmap showing top 150 (selected by adjusted p-value) differentially expressed genes comparing resistant and sensitive cell lines based on IC50 change from Navitoclax alone to BTSA1.2 and Navitoclax combined. **b**, Box plot of validation of top hits associated with sensitivity and resistance to the combination by RT-qPCR in cell lines categorized as sensitive or resistant to the combination (corresponding to Fig. 2a). Relative gene expression was normalized using RPL27. Analysis was done in 7 sensitive cell lines and 6 resistant cell lines. The lines within the boxes show the median expression values, the box denotes the IQR, while the whiskers indicate maxima and minima values. Data are mean  $\pm$  SD from n=3 independent experiments. Statistics was calculated using unpaired t-test. **c**, Gene expression of MUC13 in SW480 cell transfected with siRNA CTR or siRNA MUC13. Data are mean  $\pm$  SD from n=3 independent experiments. Source data are provided as a Source Data file.

**Supplementary Table 1. Structure-activity relationships of BAX activators based on *in vitro* binding and cellular activity**

| Compounds  | 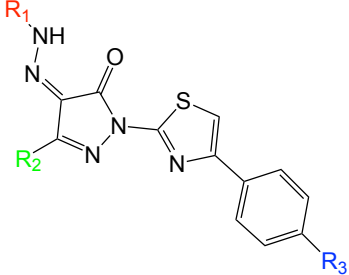 <p>Definition of R1, R2, R3 groups</p>                                                                                                                                                                                                                                             | BIM SAHB - BAX Competition - FPA IC50 (nM) | Viability Inhibition - SU-DHL5 - IC50 (μM) |
|------------|----------------------------------------------------------------------------------------------------------------------------------------------------------------------------------------------------------------------------------------------------------------------------------------------------------------------------------------------------------------------|--------------------------------------------|--------------------------------------------|
| BTSA1.2    |  <p>R1 =  R2 =  R3= H</p>                                                                                         | 149 ± 36                                   | 0.23 ± 0.02                                |
| BTSA1      |  <p>R1 =  R2 =  R3= H</p>                                                                                         | 247 ± 30                                   | 0.44 ± 0.04                                |
| BAM7       |  <p>R1 =  R2 = Me R3= H</p>                                                                                                                                                                    | 3483 ± 979                                 | >25                                        |
| Compound 4 |  <p>R1 =  R2 = Me R3= H</p>                                                                                                                                                                    | 2344 ± 838                                 | >25                                        |
| Compound 5 |  <p>R1 =  R2 =  R3= H</p>                                                                                   | 497 ± 74                                   | 2.8 ± 1                                    |
| Compound 6 |  <p>R1 =  R2 =  R3= </p> | 504 ± 92                                   | 16.1 ± 4.2                                 |

Measurements of IC50 based on competitive fluorescence polarization assay of the FITC-BIM SAHB - BAX complex and viability assays in SU-DHL-5 cell line.



**Supplementary Table 2. Stability of compounds in the presence of mouse liver microsomes.**

|                 | <b>% Remaining of Initial Compound</b> |        |        |        |        |
|-----------------|----------------------------------------|--------|--------|--------|--------|
| <b>Compound</b> | 0 min                                  | 10 min | 20 min | 30 min | 60 min |
| BTSA1.2         | 100                                    | 107    | 109    | 100    | 97     |
| BTSA1           | 100                                    | 98     | 93     | 96     | 68     |

**Supplementary Table 3. Genomic alterations in panel of human cancer cell lines**

| Tissue     | Cell line  | TP53 status | RAS status    | BRAF status   | PIK3CA status |
|------------|------------|-------------|---------------|---------------|---------------|
| Colorectal | RKO        | WT          | WT            | Mutant        | Mutant        |
|            | HCT-116    | WT          | Mutant        | Mutant        | Mutant        |
|            | HT-29      | Mutant      | WT            | Mutant        | Mutant        |
|            | SW480      | Mutant      | Mutant        | WT            | WT            |
|            | COLO320    | Mutant      | WT            | WT            | WT            |
|            | DLD1       | Mutant      | Not available | Not available | Not available |
| Breast     | Hs-578-T   | Mutant      | WT            | WT            | WT            |
|            | MCF-7      | WT          | WT            | WT            | Mutant        |
|            | MDA-MB-231 | Mutant      | Mutant        | Mutant        | WT            |
|            | LM2        | Mutant      | Mutant        | Mutant        | Not available |
|            | SK-BR-3    | Mutant      | WT            | WT            | WT            |
| Pancreatic | BxPC-3     | Mutant      | WT            | Mutant        | WT            |
|            | MIA-PaCa-2 | Mutant      | Mutant        | WT            | WT            |
|            | Capan-1    | Mutant      | Mutant        | WT            | WT            |
|            | Capan-2    | Negative    | Mutant        | WT            | WT            |
|            | AsPC-1     | Negative    | Mutant        | WT            | WT            |
| NSCLC      | NCI-H460   | WT          | Mutant        | WT            | Mutant        |
|            | HOP-92     | Mutant      | Mutant        | WT            | WT            |
|            | NCI-H23    | Mutant      | Mutant        | WT            | WT            |
|            | NCI-H1703  | Negative    | WT            | WT            | WT            |
|            | NCI-H520   | Mutant      | WT            | WT            | WT            |
|            | Calu-6     | Mutant      | Mutant        | WT            | WT            |
| Melanoma   | SK-MEL-28  | Mutant      | WT            | Mutant        | Mutant        |
|            | SK-MEL-30  | WT          | WT            | Mutant        | WT            |
|            | A375       | WT          | WT            | Mutant        | WT            |
| Lymphoma   | Farage     | Mutant      | WT            | WT            | WT            |
|            | SU-DHL-4   | Mutant      | WT            | WT            | WT            |
|            | SU-DHL-5   | WT          | WT            | WT            | WT            |
|            | SU-DHL-6   | Mutant      | WT            | WT            | WT            |
|            | SU-DHL-16  | Negative    | WT            | WT            | WT            |
|            | Namalwa    | Mutant      | WT            | WT            | WT            |
|            | Pfeiffer   | Negative    | WT            | WT            | WT            |
|            | REC-1      | Mutant      | WT            | WT            | WT            |
| Leukemia   | SKM1       | Mutant      | Mutant        | WT            | WT            |
|            | U937       | Mutant      | WT            | WT            | WT            |
|            | HEL        | Mutant      | WT            | WT            | WT            |
|            | HL60       | Negative    | Mutant (NRAS) | WT            | WT            |
|            | OCIAML3    | WT          | Mutant (NRAS) | WT            | WT            |
|            | ML2        | WT          | Mutant        | WT            | WT            |

**Supplementary Table 4. Top 150 differentially expressed genes in cell lines resistant or sensitive to the combination**

| <b>gene</b>                     | <b>log2FC</b> | <b>padj*</b> |
|---------------------------------|---------------|--------------|
| ENSG00000038427.11:VCAN         | 8.07          | 0            |
| ENSG00000148798.5:INA           | -7.75         | 2E-15        |
| ENSG00000198758.6:EPS8L3        | 7.98          | 7E-15        |
| ENSG00000257764.2:RP11-1143G9.4 | 7.68          | 4.064E-12    |
| ENSG00000249835.2:VCAN-AS1      | 7.79          | 1.3369E-11   |
| ENSG00000129451.7:KLK10         | 6.86          | 3.8403E-11   |
| ENSG00000162366.3:PDZK1IP1      | 6.98          | 1.0235E-10   |
| ENSG00000173702.3:MUC13         | 5.64          | 1.781E-10    |
| ENSG00000123405.9:NFE2          | 6.22          | 1.781E-10    |
| ENSG00000114115.5:RBP1          | 6.25          | 1.781E-10    |
| ENSG00000183111.7:ARHGEF37      | 4.97          | 1.781E-10    |
| ENSG00000147443.8:DOK2          | 6.54          | 3.416E-10    |
| ENSG00000189280.3:GJB5          | 6.32          | 5.2806E-10   |
| ENSG00000144810.11:COL8A1       | 7.23          | 7.0533E-10   |
| ENSG00000136689.14:IL1RN        | 6.92          | 9.324E-10    |
| ENSG00000151388.6:ADAMTS12      | 6.67          | 9.3405E-10   |
| ENSG00000115461.4:IGFBP5        | 6.63          | 9.3405E-10   |
| ENSG00000163735.6:CXCL5         | 6.38          | 1.8778E-09   |
| ENSG00000117525.9:F3            | 5.96          | 2.2505E-09   |
| ENSG00000128422.11:KRT17        | 6.17          | 4.5033E-09   |
| ENSG00000162344.3:FGF19         | 6.97          | 5.7673E-09   |
| ENSG00000101076.12:HNF4A        | 5.43          | 7.9375E-09   |
| ENSG00000100448.3:CTSG          | 7.35          | 8.2191E-09   |
| ENSG00000108244.12:KRT23        | 6.27          | 8.3882E-09   |
| ENSG00000214049.6:UCA1          | 5.77          | 8.8483E-09   |
| ENSG00000135480.10:KRT7         | 6.2           | 9.1776E-09   |
| ENSG00000198848.8:CES1          | 5.76          | 9.1776E-09   |
| ENSG00000172232.5:AZU1          | 6.6           | 1.0157E-08   |
| ENSG00000204385.6:SLC44A4       | 5.97          | 1.5157E-08   |
| ENSG00000120708.12:TGFBI        | 5.91          | 1.7683E-08   |
| ENSG00000196415.5:PRTN3         | 6.4           | 1.9607E-08   |
| ENSG00000163032.7:VSNL1         | 5.48          | 2.29E-08     |
| ENSG00000134762.12:DSC3         | 5.87          | 2.5095E-08   |
| ENSG00000178623.7:GPR35         | 4.67          | 4.2854E-08   |
| ENSG00000268739.1:CTC-518B2.12  | 7.08          | 4.448E-08    |
| ENSG00000167165.14:UGT1A6       | 5.57          | 4.448E-08    |

|                                 |       |            |
|---------------------------------|-------|------------|
| ENSG00000147027.3:TMEM47        | 6     | 4.5726E-08 |
| ENSG00000167755.9:KLK6          | 5.49  | 5.0234E-08 |
| ENSG00000148346.7:LCN2          | 5.61  | 5.0933E-08 |
| ENSG00000086696.6:HSD17B2       | 6.29  | 6.7697E-08 |
| ENSG00000108602.13:ALDH3A1      | 6.18  | 7.3833E-08 |
| ENSG00000153292.11:GPR110       | 6.32  | 7.3833E-08 |
| ENSG00000124212.5:PTGIS         | 5.72  | 1.6141E-07 |
| ENSG00000136542.4:GALNT5        | 5.81  | 1.8016E-07 |
| ENSG00000166825.9:ANPEP         | 5.99  | 1.9406E-07 |
| ENSG00000140297.8:GCNT3         | 5.19  | 2.3699E-07 |
| ENSG00000138207.8:RBP4          | 4.91  | 2.4075E-07 |
| ENSG00000257671.1:RP3-416H24.1  | 5.6   | 2.6048E-07 |
| ENSG00000215182.6:MUC5AC        | 5.3   | 2.7323E-07 |
| ENSG00000149516.9:MS4A3         | 6.94  | 2.8385E-07 |
| ENSG00000086548.8:CEACAM6       | 5.55  | 2.9162E-07 |
| ENSG00000100427.11:MLC1         | 5.64  | 3.1312E-07 |
| ENSG00000117472.5:TSPAN1        | 5.64  | 3.1312E-07 |
| ENSG00000124107.5:SLPI          | 5.64  | 3.6677E-07 |
| ENSG00000206538.3:VGLL3         | 5.52  | 5.1676E-07 |
| ENSG00000272259.1:RP11-305P22.9 | -7.07 | 6.0774E-07 |
| ENSG00000160181.4:TFF2          | 6.32  | 7.5091E-07 |
| ENSG00000236886.2:AC007563.5    | 6.43  | 7.5091E-07 |
| ENSG00000156959.7:LHFPL4        | -6.21 | 7.8082E-07 |
| ENSG00000133048.8:CHI3L1        | 5.05  | 8.4329E-07 |
| ENSG00000165349.7:SLC7A3        | -6.42 | 8.9781E-07 |
| ENSG00000197561.2:ELANE         | 6.34  | 1.2126E-06 |
| ENSG00000105388.10:CEACAM5      | 4.84  | 1.3457E-06 |
| ENSG00000177191.2:B3GNT8        | 4.58  | 1.3587E-06 |
| ENSG00000186188.6:FFAR4         | 6.13  | 1.3971E-06 |
| ENSG00000149573.4:MPZL2         | 5.34  | 1.4141E-06 |
| ENSG00000228695.5:CES1P1        | 5.89  | 1.5455E-06 |
| ENSG00000184254.12:ALDH1A3      | 5.07  | 1.5892E-06 |
| ENSG00000119508.13:NR4A3        | -4.31 | 1.616E-06  |
| ENSG00000139329.4:LUM           | 5.18  | 1.7938E-06 |
| ENSG00000236699.4:ARHGEF38      | 5.03  | 1.9035E-06 |
| ENSG00000145934.11:TENM2        | 4.46  | 1.9228E-06 |
| ENSG00000104368.13:PLAT         | 5.37  | 1.9355E-06 |
| ENSG00000147206.12:NXF3         | 5.53  | 1.9355E-06 |
| ENSG00000196139.7:AKR1C3        | 5.04  | 2.4444E-06 |
| ENSG00000179873.10:NLRP11       | -5.29 | 2.479E-06  |
| ENSG00000163435.11:ELF3         | 5.21  | 2.8223E-06 |

|                                 |       |            |
|---------------------------------|-------|------------|
| ENSG00000177494.5:ZBED2         | 4.84  | 2.8893E-06 |
| ENSG00000163283.6:ALPP          | 5.03  | 2.8893E-06 |
| ENSG00000187134.8:AKR1C1        | 4.83  | 3.0885E-06 |
| ENSG00000100234.11:TIMP3        | 5.62  | 3.0981E-06 |
| ENSG00000145920.10:CPLX2        | 4.92  | 3.2478E-06 |
| ENSG00000231389.3:HLA-DPA1      | -5.19 | 3.2478E-06 |
| ENSG00000143297.14:FCRL5        | -6.02 | 3.7815E-06 |
| ENSG00000163453.7:IGFBP7        | 4.2   | 4.0792E-06 |
| ENSG00000269495.1:CTB-147C22.8  | 5.15  | 4.3001E-06 |
| ENSG00000102359.5:SRPX2         | 5.26  | 4.4848E-06 |
| ENSG00000171502.10:COL24A1      | -3.59 | 4.6451E-06 |
| ENSG00000240505.4:TNFRSF13B     | -5.04 | 4.6939E-06 |
| ENSG00000077984.4:CST7          | 5.67  | 5.0956E-06 |
| ENSG00000151892.10:GFRA1        | -4.57 | 5.3997E-06 |
| ENSG00000203697.7:CAPN8         | 5.5   | 5.3997E-06 |
| ENSG00000183531.1:Z98256.1      | 5.62  | 5.3997E-06 |
| ENSG00000196460.8:RFX8          | 5.65  | 5.6735E-06 |
| ENSG00000013297.6:CLDN11        | 4.43  | 5.6888E-06 |
| ENSG00000163220.10:S100A9       | 5.02  | 5.8496E-06 |
| ENSG00000183671.8:GPR1          | 5.16  | 7.2305E-06 |
| ENSG00000152953.8:STK32B        | -4.65 | 7.2305E-06 |
| ENSG00000124102.4:PI3           | 5.09  | 7.2305E-06 |
| ENSG00000169174.9:PCSK9         | 5.23  | 7.2305E-06 |
| ENSG00000127831.6:VIL1          | 3.84  | 7.2305E-06 |
| ENSG00000112299.7:VNN1          | 5.19  | 7.2382E-06 |
| ENSG00000058085.10:LAMC2        | 5.06  | 7.2382E-06 |
| ENSG00000152229.14:PSTPIP2      | 4.04  | 7.6674E-06 |
| ENSG00000163762.2:TM4SF18       | 5.27  | 7.7029E-06 |
| ENSG00000263711.1:RP11-169F17.1 | 6.38  | 7.9139E-06 |
| ENSG00000112149.5:CD83          | -3.62 | 8.1629E-06 |
| ENSG00000273301.1:RP11-314B1.2  | 6.02  | 9.0249E-06 |
| ENSG00000164825.3:DEFB1         | 5.85  | 9.0249E-06 |
| ENSG00000137699.12:TRIM29       | 4.7   | 9.1608E-06 |
| ENSG00000185052.7:SLC24A3       | 6.12  | 1.0066E-05 |
| ENSG00000165685.4:TMEM52B       | 5.16  | 1.0066E-05 |
| ENSG00000136155.12:SCEL         | 4.49  | 1.0066E-05 |
| ENSG00000137440.3:FGFBP1        | 4.15  | 1.0066E-05 |
| ENSG00000134339.4:SA A2         | 5.09  | 1.0066E-05 |
| ENSG00000132470.9:ITGB4         | 4.6   | 1.0265E-05 |
| ENSG00000011465.12:DCN          | 5     | 1.0556E-05 |
| ENSG00000163661.3:PTX3          | 4.79  | 1.0624E-05 |

|                                 |       |            |
|---------------------------------|-------|------------|
| ENSG00000148677.6:ANKRD1        | 4.51  | 1.0632E-05 |
| ENSG00000137265.10:IRF4         | -5.18 | 1.107E-05  |
| ENSG00000181143.11:MUC16        | -4.1  | 1.107E-05  |
| ENSG00000233038.1:AC011899.9    | 5.57  | 1.1159E-05 |
| ENSG00000158825.5:CDA           | 4.84  | 1.1623E-05 |
| ENSG00000163898.5:LIPH          | 5.03  | 1.1623E-05 |
| ENSG00000152969.12:JAKMIP1      | -5.89 | 1.1749E-05 |
| ENSG00000196735.7:HLA-DQA1      | -4.81 | 1.1749E-05 |
| ENSG00000072041.12:SLC6A15      | -5.24 | 1.2699E-05 |
| ENSG00000189334.4:S100A14       | 5.21  | 1.3559E-05 |
| ENSG00000173432.6:SAA1          | 4.74  | 1.5325E-05 |
| ENSG00000205403.8:CFI           | 4.72  | 1.5457E-05 |
| ENSG00000115363.9:EVA1A         | 4.7   | 1.5542E-05 |
| ENSG00000166250.7:CLMP          | 4.22  | 1.6195E-05 |
| ENSG00000087495.12:PHACTR3      | 5.65  | 1.6195E-05 |
| ENSG00000121552.3:CSTA          | 5.09  | 1.6195E-05 |
| ENSG00000140937.9:CDH11         | 4.97  | 1.6889E-05 |
| ENSG00000176532.3:PRR15         | 4.95  | 1.7318E-05 |
| ENSG00000151632.12:AKR1C2       | 4.05  | 1.9542E-05 |
| ENSG00000115008.5:IL1A          | 3.22  | 2.0043E-05 |
| ENSG00000065618.12:COL17A1      | 4.17  | 2.0043E-05 |
| ENSG00000117322.12:CR2          | -4.83 | 2.0172E-05 |
| ENSG00000125207.3:PIWIL1        | 5.88  | 2.0545E-05 |
| ENSG00000135903.14:PAX3         | -6.01 | 2.3041E-05 |
| ENSG00000260833.2:AC124789.1    | 5.5   | 2.3208E-05 |
| ENSG00000006747.10:SCIN         | 3.96  | 2.4457E-05 |
| ENSG00000044524.6:EPHA3         | -4.51 | 2.4663E-05 |
| ENSG00000262902.1:RP11-750B16.1 | -4.4  | 2.5078E-05 |
| ENSG00000187796.9:CARD9         | 4     | 2.5121E-05 |
| ENSG00000060566.9:CREB3L3       | 4.89  | 2.5121E-05 |
| ENSG00000147689.12:FAM83A       | 4.48  | 2.5714E-05 |

\* Statistics were obtained using a two sided Wald test, p-values attained were corrected for multiple testing using the Benjamini and Hochberg method (FDR, shown as padj in the table).

**Supplementary Table 5.** Characteristics of colorectal patient samples

| PDXs   | Age | Tissue Source             | TNM staging | MSS/MSI | BRAF Mutation | KRAS Mut  | PIK3CA Mut   |
|--------|-----|---------------------------|-------------|---------|---------------|-----------|--------------|
| COLO-1 | 74  | CRC Primary - Right colon | T4aN0Mx     | MSI-H   | BRAF_v600E    |           |              |
| COLO-2 | 35  | CRC - Liver metastasis    | T2N1Mx      | MSI-H   |               | KRAS_G13D | PIK3CA_E112K |

**Supplementary Table 6.** Primers used in the study for gene expression quantification

| Gene   | Forward primer        | Reverse primer          |
|--------|-----------------------|-------------------------|
| BCL2L1 | TGCAGGTATTGGTGAGTCGG  | ACAAAAGTATCCCAGCCGCC    |
| EPS8L3 | CCTACCAACCCACATTCTCAG | TCCCTAACCTATGACTTCCCC   |
| IGFBP7 | TGCCATGCATCCAATTCCA   | TATAGCTCGGCACCTTCACCTTT |
| IRF4   | GTGAAAATGGTTGCCAGGTGA | AGGCTTCGGCAGACCTTATG    |
| MUC13  | GTAACCAGACTGCGGATGACT | AGACTGGAAGCAACGCAGAAA   |
| NR4A3  | GCTGGGCAGAAAAGATTCCG  | CAGCAGTGTTTGACCTGATGG   |
| RPL27  | CATGGGCAAGAAGAAGATCG  | TCCAAGGGGATATCCACAGA    |
| SLC7A3 | TAAGACTCTGCAGGGGTCCA  | CCGAGAGCCAACAATCCAGT    |

## Supplementary Methods:

### Chemical Synthesis

Materials and Methods for the Chemical Syntheses. All chemical reagents and solvents were obtained from commercial sources (Aldrich, Acros, Fisher) and used without further purification unless otherwise noted. Anhydrous solvents (tetrahydrofuran, toluene, dichloromethane, diethyl ether) were obtained using a Pure Solv™ AL-258 solvent purification system. Ethanol was dried over activated 4 Å molecular sieves. Microwave reactions were performed on an Anton Paar Monowave 300. Chromatography was performed on a Teledyne ISCO CombiFlash R<sub>f</sub> 200i using disposable silica cartridges (4, 12, and 24 g). Analytical thin layer chromatography (TLC) was performed on aluminum-backed Silicycle silica gel plates (250 μm film thickness, indicator F254). Compounds were visualized using a dual wave length (254 and 365 nm) UV lamp, and/or staining with CAM (cerium ammonium molybdate) or KMnO<sub>4</sub> stains. NMR spectra were recorded on Bruker DRX 300 and DRX 600 spectrometers. <sup>1</sup>H and <sup>13</sup>C chemical shifts (δ) are reported relative to tetramethyl silane (TMS, 0.00/0.00 ppm) as internal standard or to residual solvent (CD<sub>3</sub>OD: 3.31/49.00 ppm; CDCl<sub>3</sub>: 7.26/77.16 ppm; dms<sub>o</sub>-d<sub>6</sub>: 2.50/39.52 ppm). Mass spectra were recorded on a Shimadzu LCMS 2010EV (direct injection unless otherwise noted). High resolution electrospray ionization mass spectra (ESI-MS) were obtained at the Albert Einstein College of Medicine's Laboratory for Macromolecular Analysis and Proteomics. Or obtained externally from Intertek USA, Inc. (Whitehouse, NJ;



<http://www.intertek.com/pharmaceutical/analysis/whitehouse-nj/>). Unless otherwise noted the purity of the compounds synthesized was  $\geq 95\%$  as judged by the  $^1\text{H-NMR}$  trace.

### Synthesis of BTSA 1.2 (S5)

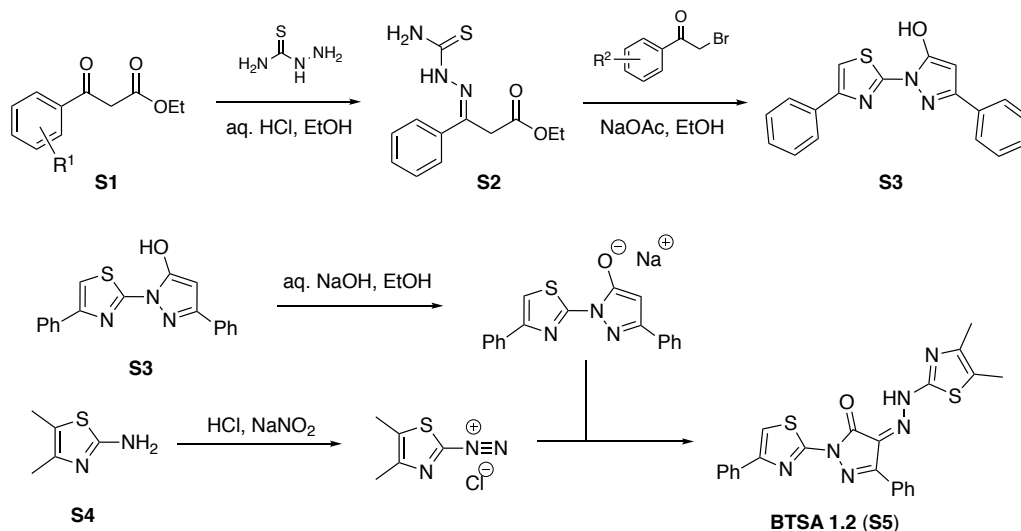

### Scheme S1: Synthesis of BTSA 1.2 (S5; overview)

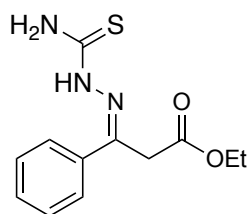

### Synthesis of ethyl-3-(2-carbamothioylhydrazono)-3-phenylpropanoate (S2):

Hydrazinecarbothioamide (2.00 g, 22.0 mmol, 1.10 equiv) was dissolved in 5% aq. HCl (64.2 mL, 90 mmol, 4.50 equiv). and ethanol (30.0 mL). Ethyl 3-oxo-3-phenylpropanoate (3.83 g, 20.0 mmol, 1.00 equiv) was added with vigorous stirring. The resulting mixture

was kept stirring vigorously at RT overnight (>12 h). White precipitate that had formed was filtered and washed with little water. The resulting white, fluffy solid (4.24 g) was washed with EtOH (15.0 mL), filtered and dried in high vacuum to obtain ethyl (Z)-3-(2-carbamothioylhydrazono)-3-phenylpropanoate (**S2**; 3.54 g, 13.3 mmol, 67 %, purity  $\geq 90$  % by  $^1\text{H-NMR}$ ). The crude product was used directly in the next step without further purification.

$^1\text{H-NMR}$  (600 MHz,  $\text{dms}\text{-}d_6$ ):  $\delta$  10.62 (s, 1H), 8.38 (s, 1H), 8.03 (s, 1H), 7.88–7.85 (m, 2H), 7.39–7.37 (m, 3H), 4.10–4.06 (m, 4H), 1.16 (t,  $J = 7.1$  Hz, 3H).  $^{13}\text{C-NMR}$  (151 MHz,  $\text{dms}\text{-}d_6$ ):  $\delta$  179.2, 168.3, 142.3, 136.8, 129.2, 128.3, 126.5, 60.8, 33.2, 14.0.

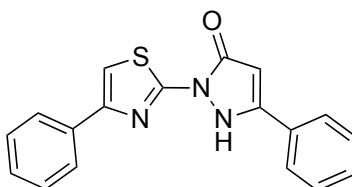

### Synthesis of 5-phenyl-2-(4-phenylthiazol-2-yl)-1,2-dihydro-3H-pyrazol-3-one (**S3**):

In a 60 mL centrifuge tube with stir bar and cap, ethyl-3-(2-carbamothioylhydrazono)-3-phenylpropanoate (**S2**; 1.06 g, 4.00 mmol, 1.00 equiv) and 2-bromo-1-phenylethan-1-one (1.04 g, 5.20 mmol, 1.30 equiv) were suspended in Ethanol (21 mL). The mixture was stirred at RT. Almost immediately, all material dissolved, and ca. 1 min later, a thick, white precipitate formed. After 60 min, sodium acetate (492 mg, 6.00 mmol, 1.50 equiv) was added, and the mixture was kept stirring overnight (>12 h) at RT. 20.0 mL of water were added, the mixture filtered under reduced pressure. Residual material in the reaction vessel was rinsed out with little more water. The residue obtained was washed with more water (total volume of the collected aqueous phases: 60.0 mL). The crude product was

obtained as an off white solid that was dried in high vacuum. After purification on the Isco CombiFlash (0.0→60.0 % CH<sub>2</sub>Cl<sub>2</sub> in hexanes), **5-phenyl-2-(4-phenylthiazol-2-yl)-1,2-dihydro-3H-pyrazol-3-one (S3)** was obtained as colorless solid (850 mg, 2.66 mmol, 71 %).

**TLC:** *R<sub>f</sub>* 0.75 (50 % CH<sub>2</sub>Cl<sub>2</sub> in hexanes). **<sup>1</sup>H-NMR** (600 MHz, dms<sub>o</sub>-*d*<sub>6</sub> + 2 dr py- *d*<sub>5</sub>)<sup>1</sup>: δ 8.03 (d, *J* = 7.3 Hz, 2H), 7.89 (d, *J* = 7.3 Hz, 2H), 7.86 (s, 1H), 7.51–7.45 (m, 5H), 7.37–7.34 (m, 1H), 6.08 (s, 1H). **<sup>13</sup>C-NMR** (151 MHz, dms<sub>o</sub>-*d*<sub>6</sub> + 2 dr py- *d*<sub>6</sub>): δ 158.5, 155.9, 153.0, 150.1, 133.9, 130.4, 129.7, 128.8, 128.7, 128.0, 126.1, 126.0, 109.8, 88.2. **ESI-MS** *m/z* (rel int): (320.1 ([M+H]<sup>+</sup>, 100). **HRMS** calculated for C<sub>18</sub>H<sub>14</sub>N<sub>3</sub>OS (M+H) 320.0852, found: 320.0853.

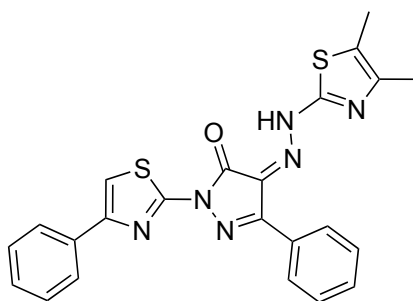

**Synthesis of 4-(2-(4,5-dimethylthiazol-2-yl)hydrazono)-5-phenyl-2-(4-phenylthiazol-2-yl)-2,4-dihydro-3H-pyrazol-3-one (S5; BTSA 1.2):**

To a suspension of 4,5-dimethylthiazol-2-amine (120 mg, 0.939 mmol) in hydrochloric acid (half concentrated, 0.75 mL, 12.4 mmol, 13.2 equiv) in an open vessel in a wet ice/NaCl cooling bath (temperature was kept at ≤ -5 °C) was added drop-wise a solution of sodium nitrite (64.8 mg, 0.939 mmol, 1.00 equiv) in water (0.47 mL) via pipette. The

<sup>1</sup> If the NMR is taken in pure dms<sub>o</sub>-*d*<sub>6</sub>, a mixture of tautomers is observed. Addition of pyridine shifts the equilibrium entirely to one side, allowing for the detection of one distinct set of signals.

diazonium salt was formed as a deep yellow solution. The starting material had dissolved completely after ca 10 min and the solution was stirred at  $\leq -5$  °C for another 15 min. In parallel, 5-phenyl-2-(4-phenylthiazol-2-yl)-2,4-dihydro-3H-pyrazol-3-one (**S3**; 300 mg, 0.939 mmol, 1.00 equiv) was dissolved in aqueous sodium hydroxide (2.50 M; 0.94 mL, 2.35 mmol, 2.50 equiv) and ethanol (0.94 mL). A clear solution formed after a few minutes and was stirred for another 10 min at RT [*Note*: in case of some of the substituted analogs, the solubility is considerably lower, resulting either in incomplete dissolution or precipitate forming from a solution initially formed. In these cases, water/ethanol (1:1) is added in small increments until a solution is formed. The solution of the anionic species formed above was then added to the diazonium salt in a drop-wise fashion. [*Note*: It is crucial to maintain proper cooling and mixing throughout the addition!]. Deep red precipitate formed almost instantaneously. After complete addition, the mixture was warmed to RT and stirred for another 20 min. TLC analysis of a reaction aliquot (either directly diluted in little MeOH or subjected to a H<sub>2</sub>O/EtOAc micro-workup) indicated consumption of the thiazol amine, formation of a new product, some more polar colored byproducts, as well remaining **S3**. The mixture was diluted with water (1.0 mL), filtered into a Buchner funnel with filter paper, washed with little water (ca. 3.0 mL), then dried in the air stream of the filtration apparatus. The pre-dried material was transferred into a flask and dried additionally in high vacuum. After purification on the Isco CombiFlash (0.1→5.0 % MeOH in CH<sub>2</sub>Cl<sub>2</sub>), 4-(2-(4,5-dimethylthiazol-2-yl)hydrazono)-5-phenyl-2-(4-phenyl-thiazol-2-yl)-2,4-dihydro-3H-pyrazol-3-one (**BTSA 1.2 (S5)**); 261 mg, 0.569 mmol 61 %) was obtained as bright red solid.

[Note: This synthetic protocol is highly sensitive to mixing/cooling issues, which are complicated by the fact that the product and re-protonated intermediate precipitate during the reaction. We noticed that in some cases, considerable amounts of impurities, stemming from the decomposition of the diazonium reagent, can be formed. Additional chromatography and/or re-crystallization (most commonly from dioxane) of the product is required in these cases. As a result, yields can be low, despite often acceptable conversions, as judged by TLC.

**TLC:**  $R_f$  0.90 (5 % MeOH in  $\text{CH}_2\text{Cl}_2$ ).  **$^1\text{H-NMR}$**  (600 MHz,  $\text{dms}\text{-}d_6$ ):  $\delta$  8.14 (d,  $J = 7.1$  Hz, 2H), 7.99 (dd,  $J = 8.1, 1.0$  Hz, 2H), 7.80 (s, 1H), 7.54–7.45 (m, 5H), 7.35 (t,  $J = 7.3$  Hz, 1H), 2.25 (s, 3H), 2.18 (s, 3H).  **$^{13}\text{C-NMR}$**  (151 MHz,  $\text{dms}\text{-}d_6$ ):  $\delta$  177.7, 154.7, 152.5, 149.7, 149.2, 134.9, 134.2, 130.9, 129.7, 129.6, 128.7, 128.4, 128.0, 127.9, 125.9, 119.1, 108.8, 11.7, 11.4. **ESI-MS**  $m/z$  (rel int): (459.1 ( $[\text{M}+\text{H}]^+$ ), 100). **HRMS** calculated for  $\text{C}_{22}\text{H}_{13}\text{N}_6\text{O}_3\text{S}_2$  (M+H) 459.1056, found: 459.1051.

**$^1\text{H}$ - and  $^{13}\text{C}$ -NMR traces of BTSA 1.2 (S5)**
